# Supplementary material for: Characteristics, Outcomes, and Severity Risk Factors Associated With SARS-CoV-2 Infection Among Children in the US National COVID Cohort Collaborative
Source: PubMed Central journal article supplement (PMC8826172; doi:10.1001/jamanetworkopen.2021.43151), 2022-02-08
Supplement: jamanetwopen-e2143151-s001.pdf [file jamanetwopen-e2143151-s001.pdf]

## Supplementary Online Content

Martin B, DeWitt PE, Russell S, et al. Characteristics, outcomes, and severity risk factors associated with SARS-CoV-2 infection among children in the US National COVID Cohort Collaborative. *JAMA Netw Open*. 2022;5(2):e2143151.  
doi:10.1001/jamanetworkopen.2021.43151

**eMethods.** Detailed Methods

**eTable 1.** N3C Pediatric and Adult Cohort Characteristics

**eTable 2.** Adjusted Odds for Severe Disease by Demographic or Comorbidity Variable

**eTable 3.** Medication Administration Rates by Pediatric Severity Subgroup

**eTable 4.** Vital Sign Changes During the First Week of Hospitalization

**eTable 5.** Changes in Laboratory Test Values During the First Week of Hospitalization

**eTable 6.** Proportion of Children With a Given Lab Test Result by Severity Subgroup

**eTable 7.** MIS-C Versus Acute COVID-19 Characteristics, Outcomes, and Risk Factors

**eTable 8.** Delta Versus Pre-Delta Differences in Patient Characteristics, Outcomes, and Severity Risk Factors

**eFigure 1.** Geographic Distribution and Case Incidence Over Time N3C Pediatric Patients

**eFigure 2.** Subregion Positive Test Result Trends by Test Type

**eFigure 3.** Change in Qualifying Criteria for “Severe” Subgroup Classification Over Time

**eFigure 4.** Maximum Clinical Severity Distributions Among Prespecified Age Groups

**eFigure 5.** Antimicrobial and Immunomodulatory Medication Usage Trends

**eFigure 6.** Additional Vital Sign and Laboratory Value In-Hospital Trajectories

**eReferences**

This supplementary material has been provided by the authors to give readers additional information about their work.

## **eMethods. Detailed Methods**

### *N3C Structure*

As described in prior work<sup>1-3</sup>, the N3C is housed in a cloud-based, secure, data enclave managed by the National Center for Advancing Translational Sciences (NCATS) to which contributing partner sites submit a limited data set in one of four common data models (CDMs). Thereafter, sites continue to provide weekly data updates. N3C harmonizes all data into the Observational Medical Outcomes Partnership (OMOP) CDM<sup>4</sup>. See Haendel et al.<sup>3</sup> for details regarding data transfer, harmonization, and data quality assurance and integration. Computable phenotypes for COVID-19 and N3C COVID-negative controls are publicly available on GitHub<sup>1</sup>.

### *N3C Patients and Prior Medical History Data*

N3C includes cases, controls, and additional non-SARS-CoV-2 related patient encounters (both inpatient and outpatient) all available for analysis. All N3C cases and demographically matched (by age, sex, race, and ethnicity) SARS-CoV-2 negative controls are drawn from encounters in the database starting on or after 1/1/2020. Positive cases are defined via a priori defined SARS-CoV-2 testing and diagnosis code criteria. Specifically, an N3C SARS-CoV-2 case includes any patient from an N3C study site with an encounter on or after 1/1/2020 meeting the following requirements:

- 1) one of a set of a priori-defined SARS-CoV-2 laboratory tests,
- 2) a “strong positive” diagnostic code, or
- 3) two “weak positive” diagnostic codes during one encounter or on the same date prior to 5/1/2020.

This case definition is publicly available on GitHub<sup>1</sup>. Encounters in the same health system on or after 1/1/2018 are also included to provide relevant clinical information on pre-existing health conditions (“lookback data”). For the purposes of our analysis

Controls within the database (not used for the purposes of this work’s analysis) include patient encounters with a negative SARS-CoV-2 test (and no positive SARS-CoV-2 testing) who are matched by age, sex, race, and ethnicity to the SARS-CoV-2 positive cases. Data for all other patient encounters from the N3C sites during the study period (including many children without any SARS-CoV-2 testing) during the study period are also available within the N3C database for analysis.

### *Index Encounter and Clinical Severity Definition*

The N3C index encounter assigned to a child with a positive SARS-CoV-2 test result was identified via evaluation of all encounters starting up to 30 days before through 7 days after each positive test. We selected as the index encounter that which, amongst this encounter set, demonstrated the maximum Clinical Progression Scale (CPS) score (created by the World Health Organization [WHO] for COVID-19 clinical research<sup>5</sup>). Of note, we combined certain WHO CPS categories due to data limitations (e.g., certain sites did not submit fraction of inspired oxygen [FiO<sub>2</sub>]), resulting in four separate outcome groups:

- 1) Mild (outpatient visit only)
- 2) Mild ED (outpatient with emergency department visit)
- 3) Moderate (hospitalized without requiring invasive ventilation, vasopressors/inotropes, or ECMO)
- 4) Severe (hospitalized and requiring invasive ventilation, vasopressors/inotropes, or ECMO, or death)

As such, we identified a single encounter for each SARS-CoV-2 positive pediatric patient for cohort analysis. All subsequent visit-level analyses were performed using this select encounter only.

### *Comorbidity Identification*

All concept sets developed for and utilized within this report are freely available on the platform and include input from clinical subject matter and informatics experts. All concept sets and analytic pipelines are fully reproducible and will be made publicly available. Children with asthma, obesity, and diabetes mellitus as well as those who received vasoactive-inotropic support were identified via adaptation and application of existing concept sets within the enclave. Children with a pediatric complex chronic condition<sup>6</sup> (PCCC) were identified using an adapted version of our prior PCCC R implementation<sup>7</sup>.

### *Additional Software Packages Used*

We used a variety of SQL, python, and R packages to clean and analyze data. We utilized SparkR<sup>8</sup> and pyspark<sup>9</sup> to interface with Apache Spark<sup>10</sup> and utilized R's ggplot2<sup>11</sup> for all visualizations.

### *Additional Study Methods (as per the STROBE<sup>12</sup> guidelines):*

**Study Design:** Prospective cohort study of pediatric patients within the N3C

**Setting:** Of the 90 healthcare sites that signed data transfer agreements (DTAs) with the N3C, 65 contributed data to the N3C enclave. Among these, 56 sites contributed data which 1) completed harmonization and integration, 2) was released for analysis, and 3) included the necessary death and mechanical ventilation information. Each of these 56 data partners represents an individual healthcare entity (e.g. clinic, hospital, healthcare center, or healthcare network). Many of these include large health systems with numerous, separate primary care, urgent care, and inpatient care locations. All subsequent patient encounters at each site beginning after the N3C join date are included along with relevant lookback data for each patient among the contributed data (includes encounters from each participating site starting on or after 1/1/2018).

**Participants:** All children <19-years-old at the time of their first SARS-CoV-2 test within the N3C with an encounter end date prior to 9/24/2021.

### Variables:

#### *Patient Measurements:*

- Date/time of viral testing
- Geographic location at the time of viral testing by United States Census Bureau geographic subregion
- Demographics: EHR-documented race, ethnicity, biological sex, and age (at encounter start)
- Preselected comorbidities: asthma\*, diabetes mellitus\*, obesity<sup>†</sup>, and pediatric complex chronic condition (PCCC, as defined by Chris Feudtner et al<sup>6</sup> and determined via adaptation of our R implementation<sup>7</sup> using available diagnosis and procedure codes)
- Medication administration for each patient with matching day of hospitalization (day 0 = day of admission)
- Select patient vital sign and laboratory values documented during index encounter hospitalization

\*Asthma and diabetes mellitus diagnoses were identified via application of validated, pre-existing concept sets within the N3C enclave.

<sup>†</sup>Presence of obesity is determined only for those children  $\geq 2$ -years-old with a BMI measurement available, and obesity is defined as those with a BMI  $\geq 95^{\text{th}}$  percentile for age and sex per CDC criteria<sup>13</sup>).

#### *Outcomes Variables:*

- Severe versus moderate maximum CPS clinical severity category
- MIS-C versus acute COVID-19 patient class
- Severe versus moderate maximum CPS clinical severity category by variant era (Delta era versus pre-Delta era)
  - Delta era is defined as all encounters with a start date on or after 6/26/2021, the approximate date at which Delta variant strains exceeded 50% of all sampled strains over a two week period<sup>14</sup>

### Data Sources / Measurement:

56 data partners from the 9/24/2021 release of the N3C dataset. See Haendel et al.<sup>3</sup> for details on data ingestion, common data model mapping, quality assurance, and harmonization.

### Bias:

To assess for the introduction of bias by contributing site, we performed a sensitivity analysis to evaluate the impact of the data source (that is, the contributing healthcare site) on the strength of association between each variable and patient maximum clinical severity. For each of the above listed outcome variables, a sensitivity analysis was performed to identify changes in the strength of association between a given predictor and the outcome of interest (see “Statistical Methods” section below).

### Study Size:

The study size was determined by the number of index patient encounters (see above) identified at each contributing data partner during the study period.

### Quantitative Variables:

Quantitative variables such as patient age and BMI are reported as medians with associated interquartile range (IQR). Patients are grouped based on index encounter maximum clinical severity (e.g. mild, mild ED, moderate, or severe) to aid in identification of variables associated with higher peak clinical severity. For vital sign measurements obtained during hospitalization, each vital sign is reported using the mean for that day (e.g. day 0) over all patients in a given maximum clinical severity category with its corresponding 95% confidence interval. Similarly, laboratory test values are reported using the mean for each lab on a given day of hospitalization over all patients with the corresponding 95% confidence interval and grouped by maximum clinical severity category. When vital signs and laboratory test values are plotted by day of hospitalization, the median is shown along with the associated IQR for that day.

### Statistical Methods

As noted above, quantitative variables are reported as medians with corresponding interquartile ranges. Categorical variables (e.g. ethnicity, race, or presence of a particular PCCC category) are reported as the number of patients and associated percentage, stratified by maximum clinical severity category. We used chi square deviance tests to evaluate for statistically significant changes in patient severity over time (specifically the odds of moderate or severe disease) and statistically significant change in the relative proportions of preselected age groups over time. Proportions of children in each maximum clinical severity category receiving a given medication or medication class (e.g. corticosteroid) were compared using Pearson's chi-squared test statistic. To report on the percent of hospitalized patients receiving a given medication or medication class, patients were grouped by study quarter (three month blocks), by index encounter start date, to allow for some granularity while ensuring that each datapoint represented a patient group of at least 20 patients (as reporting of results for groups comprised of <20 patients is not allowed per N3C policy). Separate lines for pediatric and adult classes were plotted to highlight changes in medication use over time during the study period within these two groups.

Multivariable logistic regression (MLR) was used to identify which predictors among a set of preselected variables were associated with an increased odds of severe (versus moderate) maximum clinical severity. Preselected variables included biologic sex, age, ethnicity, race, asthma, obesity, and PCCC categories. Diabetes mellitus (both type I and type II) was initially selected as a predictor for evaluation; however, the low number of hospitalized children with diabetes precluded evaluation in an MLR model. To evaluate age as a risk factor, outcomes of children under 12-years-old were compared to those of children 12-years-old and over. To evaluate ethnicity as a risk factor for severe disease, Hispanic / Latino patient outcomes were compared with non-Hispanic / non-Latino patient outcomes. Similarly, to evaluate race as a risk factor for severe disease, Black / African American and non-Black, non-White severity outcomes were each compared to those of White children. To evaluate the impact of obesity, an MLR for severe (versus moderate) disease was created using only those children  $\geq 2$ -years-old with a BMI measurement available.

This same MLR approach was used to identify predictors associated with increased odds of receiving an MIS-C diagnosis (versus acute COVID-19) and to identify changes in odds of severe (versus moderate) disease in the Delta era as compared to the pre-Delta era (both overall and for individual predictors). Pre-Delta era and Delta era odds ratios (and 95% CIs) for severe disease for each predictor were calculated along with the change in odds (and corresponding 95% CI) for the change. For each MLR, a separate sensitivity analysis was performed in which we used generalized estimating equations (GEEs) to account for the impact of patient healthcare site on the odds ratio for severe disease for each predictor. All GEEs used an exchangeable working correlation structure.

Mean values for a given vital sign or laboratory test value on a given day of hospitalization (e.g. day 0 or day 7) were compared using GEEs with an exchangeable working correlation structure. We assessed for significance in change over time for each vital sign or lab result during hospitalization using a linear model to average over the first week of values. We then used the model results to estimate the difference between hospital day 0 and day 7 for each severity subgroup. Lastly, proportions of cases requiring hospitalization in the pre-Delta and Delta eras were compared using chi-square tests.

### *Data Sharing*

The N3C Data Enclave ([covid.cd2h.org/enclave](https://covid.cd2h.org/enclave)) houses fully reproducible, transparent, and broadly available limited and de-identified datasets (HIPAA definitions available at <https://www.hhs.gov/hipaa/index.html>). Enclave data can be accessed by investigators at institutions that have signed a Data Use Agreement with the NIH who have taken the required human subjects and security training and agree to the N3C User Code of Conduct. Those desiring access to the limited dataset need also supply an IRB protocol from their institution. Data access requests are reviewed by the NIH Data Access Committee. A full description of the N3C Enclave governance has been published<sup>3</sup> and additional information on the access application process is available on the NCATS website: <https://ncats.nih.gov/n3c/about/applying-for-access>. The data model utilized is OMOP 5.3.1, and specifications are available at: [https://ncats.nih.gov/files/OMOP\\_CDM\\_COVID.pdf](https://ncats.nih.gov/files/OMOP_CDM_COVID.pdf)

Additional N3C resources including code and governance documents are available within the project GitHub repositories and/or in Zenodo for archival purposes: <https://github.com/National-COVID-Cohort-Collaborative>  
<https://zenodo.org/communities/cd2h-covid/>

Additional information regarding each of the source Common Data Models is available at:

OHDSI: <https://ohdsi.org/>

PCORNet: <https://pcornet.org/>

ACT: <https://www.dbmi.pitt.edu/node/53983>

TriNetX: <https://trinetx.com/>

*Ethics and Regulatory*

The N3C data transfer to NCATS is performed under a Johns Hopkins University Reliance Protocol # IRB00249128 or individual site agreements with NIH. Use of the N3C data for this study is authorized under the following IRB Protocols:

| <b>Site</b>                  | <b>IRB name</b>                                                                              | <b>Exempted vs approved</b> | <b>Protocol number</b> |
|------------------------------|----------------------------------------------------------------------------------------------|-----------------------------|------------------------|
| University of Colorado       | Colorado Multiple Institutional Review Board                                                 | approved                    | 20-2225                |
| Johns Hopkins University     | Johns Hopkins Office of Human Subjects Research - Institutional Review Board                 | approved                    | IRB00249128            |
| University of North Carolina | University of North Carolina Chapel Hill Institutional Review Board                          | exempted                    | 20-3106                |
| Stony Brook University       | Office of Research Compliance, Division of Human Subject Protections, Stony Brook University | exempted                    | IRB2020-00604          |

eTable 1: N3C Pediatric and Adult Cohort Characteristics

| A. Pediatric Patients              |                     |                  |                 |                 |                  |                  |                  |          |                 |
|------------------------------------|---------------------|------------------|-----------------|-----------------|------------------|------------------|------------------|----------|-----------------|
| Demographic Category               | All Children Tested | PCR/Ag Positive  | PCR/Ag Negative | PCR/Ag UNK      | No PCR / Ag Test | Ab Positive      | Ab Negative      | Ab UNK   | No Ab Test      |
| Number of Encounters               | 1,068,410           | 160,166          | 655,422         | 155             | 252,667          | 7,579            | 9,399            | <20      | 1,051,425       |
| Age                                |                     |                  |                 |                 |                  |                  |                  |          |                 |
| Age(y), mean (SD)                  | 9.7 (5.9)           | 10.9 (5.8)       | 9.2 (5.9)       | 9.2 (5.7)       | 10.1 (5.9)       | 11.2 (5.6)       | 11.1 (5.7)       | *        | 9.7 (5.9)       |
| Age(y), median (IQR)               | 9.8 (4.1, 15.2)     | 11.9 (6.0, 16.1) | 9.0 (3.7, 14.8) | 8.5 (4.8, 13.8) | 10.4 (4.5, 15.7) | 12.3 (6.4, 16.2) | 12.3 (6.2, 16.2) | *        | 9.7 (4.1, 15.2) |
| Gender                             |                     |                  |                 |                 |                  |                  |                  |          |                 |
| Male                               | 542,779 (50.8%)     | 80,180 (50.1%)   | 337,987 (51.6%) | 69 (44.5%)      | 124,543 (49.3%)  | 3,873 (51.1%)    | 4,880 (51.9%)    | <20 (0%) | 534,021 (50.8%) |
| Female                             | 514,972 (48.2%)     | 79,407 (49.6%)   | 314,634 (48.0%) | 78 (50.3%)      | 120,853 (47.8%)  | 3,694 (48.7%)    | 4,484 (47.7%)    | <20 (0%) | 506,792 (48.2%) |
| Other                              | 10,659 (1.0%)       | 579 (0.4%)       | 2,801 (0.4%)    | <20 (0%)        | 7,271 (2.9%)     | <20 (0%)         | 35 (0.4%)        | <20 (0%) | 10,612 (1.0%)   |
| Ethnicity                          |                     |                  |                 |                 |                  |                  |                  |          |                 |
| Hispanic or Latino                 | 201,162 (18.8%)     | 34,899 (21.8%)   | 124,267 (19.0%) | 45 (29.0%)      | 41,951 (16.6%)   | 1,699 (22.4%)    | 1,467 (15.6%)    | <20 (0%) | 197,993 (18.8%) |
| Not Hispanic or Latino             | 702,394 (65.7%)     | 100,836 (63.0%)  | 442,833 (67.6%) | 92 (59.4%)      | 158,633 (62.8%)  | 4,671 (61.6%)    | 6,525 (69.4%)    | <20 (0%) | 691,197 (65.7%) |
| Missing / Unknown                  | 164,854 (15.4%)     | 24,431 (15.3%)   | 88,322 (13.5%)  | <20 (0%)        | 52,083 (20.6%)   | 1,209 (16.0%)    | 1,407 (15.0%)    | <20 (0%) | 162,235 (15.4%) |
| Race                               |                     |                  |                 |                 |                  |                  |                  |          |                 |
| Asian                              | 26,622 (2.5%)       | 3,450 (2.2%)     | 17,092 (2.6%)   | <20 (0%)        | 6,077 (2.4%)     | 168 (2.2%)       | 271 (2.9%)       | <20 (0%) | 26,183 (2.5%)   |
| Black or African American          | 172,861 (16.2%)     | 26,168 (16.3%)   | 109,130 (16.7%) | 26 (16.8%)      | 37,537 (14.9%)   | 977 (12.9%)      | 1,250 (13.3%)    | <20 (0%) | 170,633 (16.2%) |
| Native Hawaiian / Pacific Islander | 2,919 (0.3%)        | 380 (0.2%)       | 1,738 (0.3%)    | <20 (0%)        | 801 (0.3%)       | <20 (0%)         | 29 (0.3%)        | <20 (0%) | 2,874 (0.3%)    |
| White                              | 601,095 (56.3%)     | 89,696 (56.0%)   | 385,091 (58.8%) | 79 (51.0%)      | 126,229 (50.0%)  | 3,345 (44.1%)    | 5,249 (55.8%)    | <20 (0%) | 592,498 (56.4%) |
| Other                              | 237,079 (22.2%)     | 36,346 (22.7%)   | 131,173 (20.0%) | 46 (29.7%)      | 69,514 (27.5%)   | 2,935 (38.7%)    | 2,468 (26.3%)    | <20 (0%) | 231,673 (22.0%) |
| Missing / Unknown                  | 27,312 (2.6%)       | 3,990 (2.5%)     | 10,852 (1.7%)   | <20 (0%)        | 12,469 (4.9%)    | 128 (1.7%)       | 117 (1.2%)       | <20 (0%) | 27,067 (2.6%)   |

| Demographic Category               | All Adults Tested | PCR/Ag Positive   | PCR/Ag Negative   | PCR/Ag UNK        | No PCR/Ag Test    | Ab Positive       | Ab Negative       | Ab UNK            | No Ab Test        |
|------------------------------------|-------------------|-------------------|-------------------|-------------------|-------------------|-------------------|-------------------|-------------------|-------------------|
| B. Adult Patients                  |                   |                   |                   |                   |                   |                   |                   |                   |                   |
| Number of Encounters               | 6,149,156         | 929,785           | 3,584,274         | 863               | 1,634,234         | 93,890            | 148,073           | 154               | 5,907,039         |
| Age                                |                   |                   |                   |                   |                   |                   |                   |                   |                   |
| Age(y) mean (SD)                   | 49.8 (18.5)       | 48.0 (18.4)       | 50.5 (18.5)       | 47.2 (17.9)       | 49.4 (18.3)       | 51.8 (16.9)       | 50.2 (16.7)       | 45.4 (13.7)       | 49.8 (18.5)       |
| Age(y) median (IQR)                | 49.5 (34.1, 63.8) | 46.7 (32.2, 61.3) | 50.5 (34.6, 64.7) | 45.4 (32.5, 60.4) | 48.9 (34.0, 63.0) | 52.3 (38.2, 64.3) | 49.9 (36.5, 62.4) | 46.5 (34.7, 53.5) | 49.4 (33.9, 63.8) |
| Gender                             |                   |                   |                   |                   |                   |                   |                   |                   |                   |
| Male                               | 2,630,622 (42.8%) | 417,987 (45.0%)   | 1,529,245 (42.7%) | 333 (38.6%)       | 683,057 (41.8%)   | 37,408 (39.8%)    | 59,210 (40.0%)    | 66 (42.9%)        | 2,533,938 (42.9%) |
| Female                             | 3,422,386 (55.7%) | 505,600 (54.4%)   | 2,026,790 (56.5%) | 432 (50.1%)       | 889,564 (54.4%)   | 55,996 (59.6%)    | 88,209 (59.6%)    | 88 (57.1%)        | 3,278,093 (55.5%) |
| Other                              | 96,148 (1.6%)     | 6,198 (0.7%)      | 28,239 (0.8%)     | 98 (11.4%)        | 61,613 (3.8%)     | 486 (0.5%)        | 654 (0.4%)        | <20 (0%)          | 95,008 (1.6%)     |
| Ethnicity                          |                   |                   |                   |                   |                   |                   |                   |                   |                   |
| Hispanic or Latino                 | 703,632 (11.4%)   | 154,384 (16.6%)   | 388,108 (10.8%)   | 157 (18.2%)       | 160,983 (9.9%)    | 13,481 (14.4%)    | 15,209 (10.3%)    | <20 (0%)          | 674,934 (11.4%)   |
| Not Hispanic or Latino             | 4,730,166 (76.9%) | 669,372 (72.0%)   | 2,881,057 (80.4%) | 557 (64.5%)       | 1,179,180 (72.2%) | 69,971 (74.5%)    | 118,892 (80.3%)   | 112 (72.7%)       | 4,541,191 (76.9%) |
| Missing / Unknown                  | 715,358 (11.6%)   | 106,029 (11.4%)   | 315,109 (8.8%)    | 149 (17.3%)       | 294,071 (18.0%)   | 10,438 (11.1%)    | 13,972 (9.4%)     | 34 (22.1%)        | 690,914 (11.7%)   |
| Race                               |                   |                   |                   |                   |                   |                   |                   |                   |                   |
| Asian                              | 182,864 (3.0%)    | 25,726 (2.8%)     | 109,531 (3.1%)    | 41 (4.8%)         | 47,566 (2.9%)     | 3,505 (3.7%)      | 6,106 (4.1%)      | <20 (0%)          | 173,248 (2.9%)    |
| Black or African American          | 874,647 (14.2%)   | 141,483 (15.2%)   | 539,304 (15.0%)   | 114 (13.2%)       | 193,746 (11.9%)   | 11,022 (11.7%)    | 16,221 (11.0%)    | <20 (0%)          | 847,395 (14.3%)   |
| Native Hawaiian / Pacific Islander | 10,891 (0.2%)     | 1,827 (0.2%)      | 5,421 (0.2%)      | <20 (0%)          | 3,642 (0.2%)      | 121 (0.1%)        | 253 (0.2%)        | <20 (0%)          | 10,517 (0.2%)     |
| White                              | 3,861,223 (62.8%) | 552,163 (59.4%)   | 2,359,258 (65.8%) | 424 (49.1%)       | 949,378 (58.1%)   | 53,062 (56.5%)    | 96,524 (65.2%)    | 99 (64.3%)        | 3,711,538 (62.8%) |
| Other                              | 1,045,699 (17.0%) | 170,082 (18.3%)   | 481,042 (13.4%)   | 279 (32.3%)       | 394,296 (24.1%)   | 23,869 (25.4%)    | 27,168 (18.3%)    | 41 (26.6%)        | 994,621 (16.8%)   |
| Missing / Unknown                  | 170,316 (2.8%)    | 37,524 (4.0%)     | 87,474 (2.4%)     | <20 (0%)          | 45,314 (2.8%)     | 2,220 (2.4%)      | 1,706 (1.2%)      | <20 (0%)          | 166,390 (2.8%)    |



N3C Cohort Characteristics. Demographic characteristics for pediatric (A) and adult (B) N3C patients stratified by SARS-CoV-2 test type and result. Per N3C policy, cells with <20 patients are censored and replaced each with “<20 (0%).”

\*Cell censored per N3C policy for having <20 associated patient encounters

*Definitions:* Ab = antibody, Ag = antigen, IQR = interquartile range, PCR = polymerase chain reaction, SD = standard deviation, UNK = Unknown

eTable 2: Adjusted Odds for Severe Disease by Demographic or Comorbidity Variable

| Variable                               | OR (95% CI, p-value)                | aOR (95% CI, p-value)               |
|----------------------------------------|-------------------------------------|-------------------------------------|
| Sex (male vs. female) <sup>†</sup>     | <b>1.37 (1.21-1.56, &lt; 0.001)</b> | <b>1.32 (1.19-1.46, &lt;0.001)</b>  |
| Age <sup>†</sup>                       | 0.88 (0.77-1.00, 0.05)              | 0.91 (0.82-1.02, 0.1)               |
| Ethnicity <sup>†</sup>                 | 0.96 (0.81-1.12, 0.58)              | 0.99 (0.89 – 1.09, 0.80)            |
| Black or African American <sup>‡</sup> | <b>1.25 (1.06-1.47, 0.008)</b>      | <b>1.29 (1.13-1.46, &lt;0.001)</b>  |
| Non-Black, Non-White                   | <b>1.23 (1.04-1.45, 0.01)</b>       | 1.08 (0.98-1.20, 0.13)              |
| Obese (>= 95th percentile)             | <b>1.19 (1.01-1.41, 0.04)</b>       | <b>1.19 (1.00-1.41, 0.04)</b>       |
| Asthma Diagnosis                       | 0.91 (0.73-1.13, 0.38)              | 0.87 (0.72-1.05, 0.16)              |
| <u>PCCC</u>                            |                                     |                                     |
| Any Category                           | <b>1.20 (1.16-1.24, &lt; 0.001)</b> | <b>1.16 (1.12–1.21, &lt; 0.001)</b> |
| Congenital/Genetic                     | 1.17 (0.91-1.49, 0.22)              | 1.10 (0.90-1.35, 0.35)              |
| Cardiovascular                         | <b>1.76 (1.40-2.22, &lt; 0.001)</b> | <b>1.57 (1.27-1.92, &lt; 0.001)</b> |
| Gastrointestinal                       | 1.03 (0.75-1.43, 0.85)              | 1.09 (0.78-1.52, 0.62)              |
| Heme / Immune                          | 0.83 (0.65-1.07, 0.16)              | 0.84 (0.63-1.10, 0.20)              |
| Malignancy                             | <b>1.82 (1.33-2.49, &lt;0.001)</b>  | <b>1.70 (1.18-2.45, 0.005)</b>      |
| Metabolic                              | 1.16 (0.91-1.49, 0.23)              | 1.11 (0.95-1.30, 0.19)              |
| Neonatal                               | 0.99 (0.70-1.41, 0.95)              | 0.99 (0.71-1.37, 0.95)              |
| Neuromuscular                          | <b>1.36 (1.06-1.74, 0.02)</b>       | 1.21 (0.87-1.69, 0.26)              |
| Renal                                  | <b>0.62 (0.45-0.86, 0.004)</b>      | <b>0.59 (0.43-0.80, 0.001)</b>      |
| Respiratory                            | <b>1.51 (1.10-2.08, 0.01)</b>       | <b>1.46 (1.01-2.12, 0.04)</b>       |
| Tech Dependence                        | <b>1.68 (1.19-2.38, 0.004)</b>      | <b>1.49 (1.08-2.04, 0.01)</b>       |
| Transplant                             | 1.37 (0.82-2.27, 0.23)              | 1.21 (0.71-2.09, 0.48)              |

Sensitivity analysis evaluating impact of contributing health site on odds of severe disease.

A generalized estimating equation-based analysis to determine the adjusted odds of severe (versus moderate) disease for each demographic and comorbidity variable.

Abbreviations: aOR = adjusted odds ratio, CI = confidence interval, OR = odds ratio

† Odds ratio listed for sex is the odds of a male patient developing severe disease compared to a female patient; the odds ratio for age is the odds of a patient <12-years-old getting severe disease compared to a patient  $\geq$ 12-years-old; the odds ratio for ethnicity is the odds of a Hispanic patient getting severe disease vs. a non-Hispanic patient (either not Hispanic or unknown)

‡ Odds ratio for a Black / African American child developing severe disease as compared to a White child

± Odds ratio for a non-Black, non-White child developing severe disease as compared to a White child

↓ BMI calculated as per the Centers for Disease Control and Prevention (CDC) guidelines<sup>13</sup> with obesity defined as any child  $\geq$  2-years-old with a BMI  $\geq$  95th percentile for age and sex. Percentages reported in the “Obese: BMI  $\geq$ 95th” row represent the percent of patients with a known BMI value who had a BMI greater than 95th percentile for age and sex.

eTable 3. Medication Administration Rates by Pediatric Severity Subgroup

| Medication Category      | Medication Name         | Severity Category | Children who received the medication, n (%) | p value*  |
|--------------------------|-------------------------|-------------------|---------------------------------------------|-----------|
| Antimicrobial Overall    |                         | Moderate          | 2679 (30)                                   | p < 0.001 |
|                          |                         | Severe            | 987 (69)                                    |           |
| Immunomodulation Overall |                         | Moderate          | 1230 (14)                                   | p < 0.001 |
|                          |                         | Severe            | 753 (53)                                    |           |
| Antimicrobial            | Azithromycin            | Moderate          | 272 (3)                                     | p < 0.001 |
|                          |                         | Severe            | 89 (6)                                      |           |
| Antimicrobial            | Remdesivir              | Moderate          | 147 (2)                                     | p < 0.001 |
|                          |                         | Severe            | 118 (8)                                     |           |
| Antimicrobial            | Systemic Antibacterial  | Moderate          | 2569 (29)                                   | p < 0.001 |
|                          |                         | Severe            | 955 (67)                                    |           |
| Antimicrobial            | Systemic Antifungal     | Moderate          | 104 (1)                                     | p < 0.001 |
|                          |                         | Severe            | 136 (10)                                    |           |
| Antimicrobial            | Systemic Antiviral      | Moderate          | 234 (3)                                     | p < 0.001 |
|                          |                         | Severe            | 188 (13)                                    |           |
| Immunomodulation         | Anakinra                | Moderate          | 89 (1)                                      | p < 0.001 |
|                          |                         | Severe            | 153 (11)                                    |           |
| Immunomodulation         | Dexamethasone           | Moderate          | 412 (5)                                     | p < 0.001 |
|                          |                         | Severe            | 192 (13)                                    |           |
| Immunomodulation         | Hydrocortisone          | Moderate          | 133 (2)                                     | p < 0.001 |
|                          |                         | Severe            | 255 (18)                                    |           |
| Immunomodulation         | Infliximab              | Moderate          | 52 (0.6)                                    | p < 0.001 |
|                          |                         | Severe            | 39 (3)                                      |           |
| Immunomodulation         | Methylprednisolone      | Moderate          | 405 (5)                                     | p < 0.001 |
|                          |                         | Severe            | 310 (22)                                    |           |
| Immunomodulation         | Prednisone              | Moderate          | 437 (5)                                     | p < 0.001 |
|                          |                         | Severe            | 220 (15)                                    |           |
| Immunomodulation         | Systemic Corticosteroid | Moderate          | 1142 (13)                                   | p < 0.001 |
|                          |                         | Severe            | 684 (48)                                    |           |

Statistical comparison of medication administration during pediatric hospitalization among moderate (N = 8,822) and severe (N = 1,423) subgroups.

\*Comparison of the proportions of patients in the moderate vs severe subgroups who received a given medication / medication class.

eTable 4: Vital sign changes during the first week of hospitalization

| Vital Sign                            | Severity Comparison Metric    | Mean Value | Standard Error | CI Lower Limit | CI Upper Limit | p value   |
|---------------------------------------|-------------------------------|------------|----------------|----------------|----------------|-----------|
| Systolic blood pressure (mmHg)        | Severe: Day 0                 | 103.2      | 0.8            | 101.6          | 104.8          |           |
|                                       | Severe: Day 7                 | 109.4      | 1.2            | 107.1          | 111.7          |           |
|                                       | Severe: Day 7 - Day 0         | 6.2        | 1.4            | 3.4            | 9.0            | p < 0.001 |
|                                       | Moderate: Day 0               | 108.4      | 0.3            | 107.8          | 109.1          |           |
|                                       | Moderate: Day 7               | 112.0      | 0.8            | 110.3          | 113.6          |           |
|                                       | Moderate: Day 7 - Day 0       | 3.5        | 1.0            | 1.6            | 5.5            | p < 0.001 |
|                                       | Severe Day 0 - Moderate Day 0 | -6.2       | 0.88           | -7.92          | -4.47          | p < 0.001 |
| Heart rate (beats per minute)         | Severe: Day 0                 | 115.2      | 1.3            | 112.7          | 117.7          |           |
|                                       | Severe: Day 7                 | 92.1       | 2.0            | 88.3           | 96.0           |           |
|                                       | Severe: Day 7 - Day 0         | -23.1      | 2.2            | -27.4          | -18.7          | p < 0.001 |
|                                       | Moderate: Day 0               | 112.8      | 0.6            | 111.6          | 114.1          |           |
|                                       | Moderate: Day 7               | 85.9       | 1.5            | 82.9           | 88.9           |           |
|                                       | Moderate: Day 7 - Day 0       | -26.9      | 1.7            | -30.2          | -23.5          | p < 0.001 |
|                                       | Severe Day 0 - Moderate Day 0 | 4.69       | 1.52           | 1.72           | 7.66           | p = 0.002 |
| Respiratory rate (breaths per minute) | Severe: Day 0                 | 27.1       | 0.5            | 26.1           | 28.2           |           |
|                                       | Severe: Day 7                 | 24.2       | 0.8            | 22.7           | 25.8           |           |

|                                 |                               |      |      |       |       |           |
|---------------------------------|-------------------------------|------|------|-------|-------|-----------|
|                                 | Severe: Day 7 - Day 0         | -2.9 | 1.1  | -5.0  | -0.8  | p = 0.006 |
|                                 | Moderate: Day 0               | 25.3 | 0.2  | 24.9  | 25.7  |           |
|                                 | Moderate: Day 7               | 21.9 | 0.4  | 21.0  | 22.8  |           |
|                                 | Moderate: Day 7 - Day 0       | -3.4 | 0.5  | -4.4  | -2.4  | p < 0.001 |
|                                 | Severe Day 0 - Moderate Day 0 | 2.05 | 0.5  | 1.06  | 3.04  | p < 0.001 |
| Diastolic blood pressure (mmHg) | Severe: Day 0                 | 59.9 | 0.6  | 58.7  | 61.0  |           |
|                                 | Severe: Day 7                 | 62.9 | 0.9  | 61.0  | 64.7  |           |
|                                 | Severe: Day 7 - Day 0         | 3.0  | 1.2  | 0.6   | 5.4   | p = 0.01  |
|                                 | Moderate: Day 0               | 64.7 | 0.2  | 64.2  | 65.2  |           |
|                                 | Moderate: Day 7               | 67.9 | 0.7  | 66.6  | 69.1  |           |
|                                 | Moderate: Day 7 - Day 0       | 3.2  | 0.8  | 1.6   | 4.7   | p < 0.001 |
|                                 | Severe Day 0 - Moderate Day 0 | -5.1 | 0.65 | -6.37 | -3.83 | p < 0.001 |
| Mean arterial pressure (mmHg)   | Severe: Day 0                 | 70.4 | 1.4  | 67.7  | 73.1  |           |
|                                 | Severe: Day 7                 | 74.3 | 1.7  | 70.9  | 77.7  |           |
|                                 | Severe: Day 7 - Day 0         | 3.9  | 1.9  | 0.2   | 7.7   | p = 0.04  |
|                                 | Moderate: Day 0               | 74.3 | 0.7  | 72.9  | 75.8  |           |
|                                 | Moderate: Day 7               | 82.8 | 1.6  | 79.6  | 86.0  |           |
|                                 | Moderate: Day 7 - Day 0       | 8.4  | 2.0  | 4.5   | 12.4  | p < 0.001 |

|                  |                               |       |      |       |       |           |
|------------------|-------------------------------|-------|------|-------|-------|-----------|
|                  | Severe Day 0 - Moderate Day 0 | -7.6  | 1.99 | -11.5 | -3.69 | p < 0.001 |
| Temperature (°C) | Severe: Day 0                 | 37.2  | 0.0  | 37.1  | 37.3  |           |
|                  | Severe: Day 7                 | 36.7  | 0.1  | 36.6  | 36.8  |           |
|                  | Severe: Day 7 - Day 0         | -0.5  | 0.1  | -0.7  | -0.3  | p < 0.001 |
|                  | Moderate: Day 0               | 37.2  | 0.0  | 37.1  | 37.2  |           |
|                  | Moderate: Day 7               | 36.6  | 0.0  | 36.5  | 36.6  |           |
|                  | Moderate: Day 7 - Day 0       | -0.6  | 0.0  | -0.7  | -0.5  | p < 0.001 |
|                  | Severe Day 0 - Moderate Day 0 | -0.03 | 0.05 | -0.13 | 0.07  | p = 0.55  |
| SpO2 (%)         | Severe: Day 0                 | 95.6  | 0.3  | 94.9  | 96.3  |           |
|                  | Severe: Day 7                 | 95.1  | 0.5  | 94.1  | 96.0  |           |
|                  | Severe: Day 7 - Day 0         | -0.6  | 0.6  | -1.8  | 0.7   | p = 0.37  |
|                  | Moderate: Day 0               | 97.7  | 0.1  | 97.5  | 97.9  |           |
|                  | Moderate: Day 7               | 97.6  | 0.2  | 97.2  | 97.9  |           |
|                  | Moderate: Day 7 - Day 0       | -0.1  | 0.2  | -0.5  | 0.3   | p = 0.50  |
|                  | Severe Day 0 - Moderate Day 0 | -2.63 | 0.43 | -3.48 | -1.78 | p < 0.001 |

Statistical comparison of the initial values and trends (from day 0 to day 7 of hospitalization) for vital signs between moderate and severe pediatric subgroups.

Abbreviations: CI = confidence interval, SpO2 = peripheral oxygen saturation

eTable 5: Changes in laboratory test values during the first week of hospitalization

| Laboratory Test                            | Severity Comparison Metric    | Mean    | Standard Error | CI Lower | CI Upper | p value   |
|--------------------------------------------|-------------------------------|---------|----------------|----------|----------|-----------|
| Albumin (g/dL)                             | Severe Day 7 - Day 0          | -0.2    | 0.1            | -0.3     | -0.1     | p < 0.001 |
|                                            | Moderate Day 7 - Day 0        | -0.6    | 0.0            | -0.7     | -0.6     | p < 0.001 |
|                                            | Severe Day 0 - Moderate Day 0 | -0.54   | 0.03           | -0.61    | -0.47    | p < 0.001 |
| ALT (SGPT), IU/L                           | Severe Day 7 - Day 0          | -99.0   | 55.4           | -207.6   | 9.6      | p = 0.07  |
|                                            | Moderate Day 7 - Day 0        | -132.7  | 85.7           | -300.6   | 35.3     | p = 0.12  |
|                                            | Severe Day 0 - Moderate Day 0 | 33.65   | 13.98          | 6.24     | 61.06    | p = 0.02  |
| AST (SGOT), IU/L                           | Severe Day 7 - Day 0          | -163.1  | 57.9           | -276.5   | -49.6    | p = 0.005 |
|                                            | Moderate Day 7 - Day 0        | -93.0   | 43.9           | -179.0   | -7.0     | p = 0.03  |
|                                            | Severe Day 0 - Moderate Day 0 | 48.46   | 16.78          | 15.57    | 81.36    | p = 0.004 |
| Bilirubin (Unconjugated / Indirect), mg/dL | Severe Day 7 - Day 0          | 0.0     | 0.2            | -0.5     | 0.4      | p = 0.85  |
|                                            | Moderate Day 7 - Day 0        | -0.3    | 0.3            | -0.8     | 0.2      | p = 0.26  |
|                                            | Severe Day 0 - Moderate Day 0 | -0.05   | 0.17           | -0.38    | 0.28     | p = 0.77  |
| Bilirubin (Conjugated / Direct),mg/dL      | Severe Day 7 - Day 0          | -0.2    | 0.2            | -0.5     | 0.2      | p = 0.33  |
|                                            | Moderate Day 7 - Day 0        | -0.6    | 0.2            | -1.0     | -0.2     | p = 0.003 |
|                                            | Severe Day 0 - Moderate Day 0 | 0.09    | 0.07           | -0.04    | 0.22     | p = 0.18  |
| Bilirubin (total), mg/dL                   | Severe Day 7 - Day 0          | -0.1    | 0.3            | -0.6     | 0.4      | p = 0.67  |
|                                            | Moderate Day 7 - Day 0        | -0.6    | 0.2            | -0.9     | -0.3     | p < 0.001 |
|                                            | Severe Day 0 - Moderate Day 0 | 0.11    | 0.09           | -0.07    | 0.29     | p = 0.21  |
| BNP (all forms), pg/mL                     | Severe Day 7 - Day 0          | -4714.9 | 802.1          | -6286.9  | -3142.9  | p < 0.001 |
|                                            | Moderate Day 7 - Day 0        | -806.3  | 337.0          | -1466.8  | -145.8   | p = 0.02  |
|                                            | Severe Day 0 - Moderate Day 0 | 3,108.1 | 687.7          | 1,760.1  | 4,456.0  | p < 0.001 |
| BUN, mg/dL                                 | Severe Day 7 - Day 0          | -0.3    | 2.0            | -4.2     | 3.7      | p = 0.90  |
|                                            | Moderate Day 7 - Day 0        | -3.4    | 0.9            | -5.1     | -1.6     | p < 0.001 |
|                                            | Severe Day 0 - Moderate Day 0 | 4.65    | 0.66           | 3.35     | 5.94     | p < 0.001 |
| BUN/Creatinine ratio                       | Severe Day 7 - Day 0          | 12.5    | 2.6            | 7.5      | 17.5     | p < 0.001 |
|                                            | Moderate Day 7 - Day 0        | 7.7     | 2.0            | 3.7      | 11.7     | p < 0.001 |
|                                            | Severe Day 0 - Moderate Day 0 | 2.99    | 2.10           | -1.13    | 7.10     | p = 0.15  |
| c-reactive protein (CRP), mg/L             | Severe Day 7 - Day 0          | -137.0  | 10.7           | -157.9   | -116.0   | p < 0.001 |
|                                            | Moderate Day 7 - Day 0        | -93.4   | 6.8            | -106.8   | -80.0    | p < 0.001 |
|                                            | Severe Day 0 - Moderate Day 0 | 55.98   | 6.77           | 42.72    | 69.24    | p < 0.001 |
| Chloride, mmol/L                           | Severe Day 7 - Day 0          | -2.2    | 0.7            | -3.7     | -0.8     | p = 0.003 |
|                                            | Moderate Day 7 - Day 0        | 0.5     | 0.4            | -0.4     | 1.3      | p = 0.27  |
|                                            | Severe Day 0 - Moderate Day 0 | -0.18   | 0.25           | -0.67    | 0.31     | p = 0.48  |
| Creatinine, mg/dL                          | Severe Day 7 - Day 0          | -0.4    | 0.1            | -0.6     | -0.2     | p < 0.001 |
|                                            | Moderate Day 7 - Day 0        | -0.4    | 0.1            | -0.6     | -0.2     | p < 0.001 |
|                                            | Severe Day 0 - Moderate Day 0 | 0.22    | 0.06           | 0.12     | 0.33     | p < 0.001 |
| D-Dimer, mg/L                              | Severe Day 7 - Day 0          | 0.4     | 0.7            | -1.0     | 1.8      | p = 0.55  |
|                                            | Moderate Day 7 - Day 0        | -0.6    | 0.3            | -1.2     | 0.0      | p = 0.06  |
|                                            | Severe Day 0 - Moderate Day 0 | 1.22    | 0.37           | 0.49     | 1.95     | p = 0.001 |
| Erythrocyte Sed. Rate, mm/hr               | Severe Day 7 - Day 0          | 3.2     | 4.8            | -6.2     | 12.7     | p = 0.50  |
|                                            | Moderate Day 7 - Day 0        | 12.0    | 4.0            | 4.1      | 19.9     | p = 0.003 |
|                                            | Severe Day 0 - Moderate Day 0 | 5.68    | 2.11           | 1.54     | 9.82     | p = 0.007 |
| Ferritin, ng/mL                            | Severe Day 7 - Day 0          | -542.5  | 153.1          | -842.6   | -242.4   | p < 0.001 |
|                                            | Moderate Day 7 - Day 0        | -98.2   | 149.5          | -391.1   | 194.7    | p = 0.51  |
|                                            | Severe Day 0 - Moderate Day 0 | 232.82  | 102.58         | 31.76    | 433.88   | p = 0.02  |
| Fibrinogen                                 | Severe Day 7 - Day 0          | -141.5  | 24.6           | -189.7   | -93.2    | p < 0.001 |
|                                            | Moderate Day 7 - Day 0        | -163.1  | 24.4           | -210.9   | -115.3   | p < 0.001 |
|                                            | Severe Day 0 - Moderate Day 0 | -13.67  | 16.95          | -46.90   | 19.56    | p = 0.42  |



|                                              |                               |         |        |          |         |           |
|----------------------------------------------|-------------------------------|---------|--------|----------|---------|-----------|
| Glucose, mg/dL                               | Severe Day 7 - Day 0          | -19.7   | 5.4    | -30.4    | -9.1    | p < 0.001 |
|                                              | Moderate Day 7 - Day 0        | -43.0   | 5.7    | -54.1    | -31.9   | p < 0.001 |
|                                              | Severe Day 0 - Moderate Day 0 | 14.24   | 2.64   | 9.07     | 19.41   | p < 0.001 |
| Hemoglobin, g/dL                             | Severe Day 7 - Day 0          | -0.7    | 0.2    | -1.1     | -0.4    | p < 0.001 |
|                                              | Moderate Day 7 - Day 0        | -1.4    | 0.1    | -1.7     | -1.2    | p < 0.001 |
|                                              | Severe Day 0 - Moderate Day 0 | -0.53   | 0.10   | -0.73    | -0.33   | p < 0.001 |
| IL-6, pg/mL                                  | Severe Day 7 - Day 0          | 12.4    | 87.4   | -158.9   | 183.7   | p = 0.89  |
|                                              | Moderate Day 7 - Day 0        | 0.0     | 46.9   | -91.9    | 91.9    | p = 1.00  |
|                                              | Severe Day 0 - Moderate Day 0 | 78.89   | 27.77  | 24.47    | 133.32  | p = 0.005 |
| Lactate Dehydrogenase (LDH), units/L         | Severe Day 7 - Day 0          | -276.5  | 143.0  | -556.9   | 3.8     | p = 0.05  |
|                                              | Moderate Day 7 - Day 0        | -160.9  | 64.8   | -287.8   | -33.9   | p = 0.01  |
|                                              | Severe Day 0 - Moderate Day 0 | 159.38  | 57.40  | 46.88    | 271.88  | p = 0.006 |
| Lactate, mM                                  | Severe Day 7 - Day 0          | -2.1    | 0.3    | -2.7     | -1.5    | p < 0.001 |
|                                              | Moderate Day 7 - Day 0        | -2.9    | 1.2    | -5.2     | -0.6    | p = 0.02  |
|                                              | Severe Day 0 - Moderate Day 0 | 0.49    | 0.11   | 0.27     | 0.71    | p < 0.001 |
| Lymphocytes (absolute), x10 <sup>3</sup> /μL | Severe Day 7 - Day 0          | -0.1    | 0.2    | -0.5     | 0.3     | p = 0.64  |
|                                              | Moderate Day 7 - Day 0        | 0.3     | 0.2    | -0.1     | 0.6     | p = 0.12  |
|                                              | Severe Day 0 - Moderate Day 0 | -0.27   | 0.10   | -0.48    | -0.07   | p = 0.009 |
| Lymphocytes (relative), %                    | Severe Day 7 - Day 0          | 3.5     | 1.1    | 1.4      | 5.6     | p < 0.001 |
|                                              | Moderate Day 7 - Day 0        | 10.5    | 0.8    | 8.8      | 12.1    | p < 0.001 |
|                                              | Severe Day 0 - Moderate Day 0 | -7.40   | 0.78   | -8.92    | -5.87   | p < 0.001 |
| Neutrophils (absolute), x10 <sup>3</sup> /μL | Severe Day 7 - Day 0          | -0.2    | 0.8    | -1.7     | 1.3     | p = 0.82  |
|                                              | Moderate Day 7 - Day 0        | -1.5    | 0.4    | -2.2     | -0.8    | p < 0.001 |
|                                              | Severe Day 0 - Moderate Day 0 | 1.98    | 0.34   | 1.31     | 2.66    | p < 0.001 |
| Neutrophils (relative), %                    | Severe Day 7 - Day 0          | -3.2    | 1.6    | -6.4     | 0.0     | p = 0.05  |
|                                              | Moderate Day 7 - Day 0        | -8.6    | 1.2    | -10.9    | -6.2    | p < 0.001 |
|                                              | Severe Day 0 - Moderate Day 0 | 6.72    | 1.23   | 4.31     | 9.13    | p < 0.001 |
| NT-proBNP, pg/mL                             | Severe Day 7 - Day 0          | -9538.9 | 1765.5 | -12999.2 | -6078.6 | p < 0.001 |
|                                              | Moderate Day 7 - Day 0        | -1178.9 | 523.1  | -2204.2  | -153.7  | p = 0.02  |
|                                              | Severe Day 0 - Moderate Day 0 | 6,297   | 1,479  | 3,399    | 9,196   | p < 0.001 |
| pH                                           | Severe Day 7 - Day 0          | 0.10    | 0.01   | 0.08     | 0.12    | p < 0.001 |
|                                              | Moderate Day 7 - Day 0        | 0.15    | 0.02   | 0.11     | 0.18    | p < 0.001 |
|                                              | Severe Day 0 - Moderate Day 0 | -0.01   | 0.01   | -0.02    | 0.01    | p = 0.48  |
| Platelet count, x10 <sup>3</sup> /μL         | Severe Day 7 - Day 0          | 69.9    | 10.2   | 49.8     | 89.9    | p < 0.001 |
|                                              | Moderate Day 7 - Day 0        | 80.7    | 7.2    | 66.6     | 94.9    | p < 0.001 |
|                                              | Severe Day 0 - Moderate Day 0 | -48.59  | 5.41   | -59.20   | -37.98  | p < 0.001 |
| Potassium, mmol/L                            | Severe Day 7 - Day 0          | 0.03    | 0.06   | -0.09    | 0.14    | p = 0.64  |
|                                              | Moderate Day 7 - Day 0        | -0.09   | 0.04   | -0.17    | -0.01   | p = 0.03  |
|                                              | Severe Day 0 - Moderate Day 0 | -0.17   | 0.03   | -0.23    | -0.11   | p < 0.001 |
| Procalcitonin, ng/mL                         | Severe Day 7 - Day 0          | -11.9   | 2.6    | -16.9    | -6.8    | p < 0.001 |
|                                              | Moderate Day 7 - Day 0        | -6.0    | 1.9    | -9.8     | -2.2    | p = 0.002 |
|                                              | Severe Day 0 - Moderate Day 0 | 8.28    | 2.65   | 3.08     | 13.48   | p = 0.002 |
| Sodium, mmol/L                               | Severe Day 7 - Day 0          | 1.6     | 0.7    | 0.2      | 3.0     | p = 0.03  |
|                                              | Moderate Day 7 - Day 0        | 1.5     | 0.4    | 0.6      | 2.4     | p = 0.001 |
|                                              | Severe Day 0 - Moderate Day 0 | -0.88   | 0.22   | -1.32    | -0.45   | p < 0.001 |
| Troponin all types, ng/mL                    | Severe Day 7 - Day 0          | -1.64   | 0.57   | -2.76    | -0.52   | p = 0.004 |
|                                              | Moderate Day 7 - Day 0        | -1.30   | 0.49   | -2.26    | -0.35   | p = 0.008 |
|                                              | Severe Day 0 - Moderate Day 0 | 0.45    | 0.21   | 0.03     | 0.87    | p = 0.04  |
| White blood cell count, x10 <sup>3</sup> /μL | Severe Day 7 - Day 0          | -2.81   | 2.81   | -8.33    | 2.70    | p = 0.32  |
|                                              | Moderate Day 7 - Day 0        | -2.00   | 1.09   | -4.14    | 0.13    | p = 0.07  |
|                                              | Severe Day 0 - Moderate Day 0 | 2.42    | 0.81   | 0.84     | 4.00    | p = 0.003 |

Statistical comparison of the initial values and trends (from day 0 to day 7 of hospitalization) for laboratory results between moderate and severe pediatric subgroups. Day 7 and day 0 mean values not shown.

*Abbreviations:* ALT = alanine aminotransferase, AST = aspartate aminotransferase, BNP = brain natriuretic peptide, BUN = blood urea nitrogen, CI = confidence interval, IL-6 = interleukin-6, NT-proBNP = N-terminal pro brain natriuretic peptide.

eTable 6: Proportion of children with a given lab test result by severity subgroup

| Lab Test                                   | Severity Category | Children with Lab Available, n (%) | Adults with Lab Available, n (%) |
|--------------------------------------------|-------------------|------------------------------------|----------------------------------|
| ALT (SGPT), IU/L                           | Severe            | 946 (66)                           | 32201 (78)                       |
|                                            | Moderate          | 3471 (39)                          | 91101 (67)                       |
| AST (SGOT), IU/L                           | Severe            | 1002 (70)                          | 33892 (82)                       |
|                                            | Moderate          | 3789 (43)                          | 103552 (76)                      |
| Albumin (g/dL)                             | Severe            | 1013 (71)                          | 34216 (83)                       |
|                                            | Moderate          | 4042 (46)                          | 107634 (79)                      |
| BNP (all forms), pg/mL                     | Severe            | 554 (39)                           | 22098 (53)                       |
|                                            | Moderate          | 1276 (14)                          | 49156 (36)                       |
| BUN, mg/dL                                 | Severe            | 1131 (79)                          | 37629 (91)                       |
|                                            | Moderate          | 4967 (56)                          | 122020 (90)                      |
| BUN/Creatinine ratio                       | Severe            | 178 (13)                           | 11721 (28)                       |
|                                            | Moderate          | 1245 (14)                          | 42383 (31)                       |
| Bilirubin (Conjugated/Direct), mg/dL       | Severe            | 599 (42)                           | 21539 (52)                       |
|                                            | Moderate          | 1651 (19)                          | 53646 (39)                       |
| Bilirubin (total), mg/dL                   | Severe            | 1032 (73)                          | 35923 (87)                       |
|                                            | Moderate          | 4067 (46)                          | 111413 (82)                      |
| Bilirubin - (Unconjugated/Indirect), mg/dL | Severe            | 278 (20)                           | 6432 (16)                        |
|                                            | Moderate          | 527 (6)                            | 14065 (10)                       |
| Chloride, mmol/L                           | Severe            | 1142 (80)                          | 37616 (91)                       |
|                                            | Moderate          | 4987 (57)                          | 121951 (90)                      |
| Creatinine, mg/dL                          | Severe            | 1133 (80)                          | 37667 (91)                       |
|                                            | Moderate          | 4984 (56)                          | 122251 (90)                      |
| D-Dimer, mg/L FEU                          | Severe            | 380 (27)                           | 19825 (48)                       |
|                                            | Moderate          | 1115 (13)                          | 58530 (43)                       |
| Erythrocyte Sed. Rate, mm/hr               | Severe            | 570 (40)                           | 11167 (27)                       |
|                                            | Moderate          | 1554 (18)                          | 24466 (18)                       |
| Ferritin, ng/mL                            | Severe            | 588 (41)                           | 24927 (60)                       |
|                                            | Moderate          | 1400 (16)                          | 69839 (51)                       |
| Fibrinogen mg/dL                           | Severe            | 617 (43)                           | 11966 (29)                       |
|                                            | Moderate          | 833 (9)                            | 15464 (11)                       |
| Glucose, mg/dL                             | Severe            | 1134 (80)                          | 37510 (90)                       |
|                                            | Moderate          | 5060 (57)                          | 121217 (89)                      |
| Hemoglobin, g/dL                           | Severe            | 1152 (81)                          | 37566 (91)                       |
|                                            | Moderate          | 5195 (59)                          | 123850 (91)                      |
| IL-6, pg/mL                                | Severe            | 137 (10)                           | 3790 (9)                         |

|                                                   |          |           |             |
|---------------------------------------------------|----------|-----------|-------------|
|                                                   | Moderate | 111 (1)   | 6042 (4)    |
| Lactate Dehydrogenase (LDH), units/L              | Severe   | 398 (28)  | 19753 (48)  |
|                                                   | Moderate | 788 (9)   | 53493 (39)  |
| Lactate, mmol/L                                   | Severe   | 815 (57)  | 27913 (67)  |
|                                                   | Moderate | 1399 (16) | 57520 (42)  |
| Lymphocytes (absolute), $\times 10^3/\mu\text{L}$ | Severe   | 883 (62)  | 33569 (81)  |
|                                                   | Moderate | 4114 (47) | 109304 (80) |
| Lymphocytes (relative), %                         | Severe   | 1045 (73) | 33268 (80)  |
|                                                   | Moderate | 4677 (53) | 112995 (83) |
| NT pro BNP, pg/mL                                 | Severe   | 309 (22)  | 11608 (28)  |
|                                                   | Moderate | 889 (10)  | 29859 (22)  |
| Neutrophils (absolute), $\times 10^3/\mu\text{L}$ | Severe   | 757 (53)  | 32152 (78)  |
|                                                   | Moderate | 3684 (42) | 102215 (75) |
| Neutrophils (relative), %                         | Severe   | 671 (47)  | 33268 (80)  |
|                                                   | Moderate | 3224 (37) | 94513 (69)  |
| Platelet count, $\times 10^3/\mu\text{L}$         | Severe   | 928 (65)  | 36277 (88)  |
|                                                   | Moderate | 4339 (49) | 116436 (86) |
| Potassium, mmol/L                                 | Severe   | 1143 (80) | 37619 (91)  |
|                                                   | Moderate | 4956 (56) | 121795 (90) |
| Procalcitonin, ng/mL                              | Severe   | 325 (23)  | 17444 (42)  |
|                                                   | Moderate | 940 (11)  | 43524 (32)  |
| Sodium, mmol/L                                    | Severe   | 1144 (80) | 37628 (91)  |
|                                                   | Moderate | 4999 (57) | 121500 (89) |
| Troponin all types, ng/mL                         | Severe   | 468 (33)  | 16632 (40)  |
|                                                   | Moderate | 726 (8)   | 35537 (26)  |
| White blood cell count, $\times 10^3/\mu\text{L}$ | Severe   | 893 (63)  | 36499 (88)  |
|                                                   | Moderate | 4397 (50) | 120301 (88) |
| c-reactive protein CRP, mg/L                      | Severe   | 702 (49)  | 20175 (49)  |
|                                                   | Moderate | 1655 (19) | 49491 (36)  |
| pH                                                | Severe   | 730 (51)  | 26237 (63)  |
|                                                   | Moderate | 1015 (12) | 32237 (24)  |

Proportion of children in the moderate (N = 8,822) and severe (N = 1,423) disease subgroups alongside the number and percent of adults in the moderate (N = 136,055) and severe (N = 41,457) disease subgroups who had at least one value for a given lab test available during their inpatient hospital encounter.

eTable 7: MIS-C versus acute COVID-19 characteristics, outcomes, and risk factors.

| Category                             | MIS-C (N = 707),<br>n (%) | Acute COVID-19<br>(N = 8,241), n(%) | MIS-C vs. COVID-19<br>OR (95% CI, p-value) | MIS-C vs. COVID-19<br>aOR (95% CI, p-value) |
|--------------------------------------|---------------------------|-------------------------------------|--------------------------------------------|---------------------------------------------|
| Demographics                         |                           |                                     |                                            |                                             |
| <b>Age<sup>†</sup></b>               |                           |                                     | <b>1.81 (1.51-2.18, &lt;0.001)</b>         | <b>1.70 (1.14-2.55, 0.01)</b>               |
| Age < 1 year                         |                           |                                     |                                            |                                             |
| Age 1-5 years                        |                           |                                     |                                            |                                             |
| Age 5-12 years                       |                           |                                     |                                            |                                             |
| Age 12-18 years                      |                           |                                     |                                            |                                             |
| <b>Sex<sup>†</sup></b>               |                           |                                     | <b>1.59 (1.33-1.90, &lt;0.001)</b>         | <b>1.64 (1.33-2.02, &lt;0.001)</b>          |
| Male                                 | 416 (59)                  | 3987 (48)                           |                                            |                                             |
| Female                               | 291 (41)                  | 4237 (51)                           |                                            |                                             |
| <b>Race<sup>‡</sup></b>              |                           |                                     | <b>0.65 (0.51-0.83, &lt;0.001)</b>         | <b>0.80 (0.65-0.98, 0.03)</b>               |
| Asian                                | <20 (0)                   | 168 (2)                             |                                            |                                             |
| Black <sup>‡</sup>                   | 250 (35)                  | 2065 (25)                           | <b>1.44 (1.17-1.77, &lt;0.001)</b>         | <b>1.32 (1.03-1.69, 0.03)</b>               |
| White                                | 277 (39)                  | 3578 (43)                           |                                            |                                             |
| Other Race                           | 39 (6)                    | 293 (4)                             |                                            |                                             |
| <b>Ethnicity<sup>†</sup></b>         |                           |                                     | 1.16 (0.92-1.46, 0.22)                     | 1.23 (0.97-1.55, 0.09)                      |
| Hispanic                             | 153 (22)                  | 2155 (26)                           |                                            |                                             |
| Not Hispanic                         | 413 (58)                  | 5034 (61)                           |                                            |                                             |
| No Matching Ethnicity                | 138 (20)                  | 1015 (12)                           |                                            |                                             |
| Preselected Comorbidities            |                           |                                     |                                            |                                             |
| Asthma                               | 47 (7)                    | 850 (10)                            | <b>0.69 (0.48-1.00, 0.05)</b>              | <b>0.66 (0.49-0.90, 0.008)</b>              |
| Diabetes                             | <20 (0)                   | 256 (3)                             | *                                          | *                                           |
| Obesity <sup>‡</sup>                 | 169 (32)                  | 1275 (33)                           | <b>1.76 (1.40-2.22, &lt;0.001)</b>         | <b>1.76 (1.40-2.22, &lt; 0.001)</b>         |
| Pediatric Complex Chronic Conditions |                           |                                     |                                            |                                             |
| Any PCCC Category                    | 112 (16)                  | 2208 (27)                           | <b>0.72 (0.65-0.80, &lt;0.001)</b>         | <b>0.75 (0.62-0.90, 0.002)</b>              |
| Cong Genetic PCCC                    | 25 (4)                    | 659 (8)                             | 0.69 (0.41-1.14, 0.15)                     | 0.61 (0.29-1.28, 0.19)                      |
| CV PCCC                              | 52 (7)                    | 777 (9)                             | 1.42 (0.93-2.16, 0.10)                     | 1.38 (0.95-2.00, 0.09)                      |
| GI PCCC                              | 22 (3)                    | 650 (8)                             | 1.07 (0.55-2.09, 0.85)                     | 1.03 (0.43-2.46, 0.94)                      |

|                      |          |            |                                     |                                |
|----------------------|----------|------------|-------------------------------------|--------------------------------|
| Heme Immune PCCC     | 43 (6)   | 737 (9)    | 0.65 (0.41-1.05, 0.08)              | 0.62 (0.36-1.05,0.08)          |
| Malignancy PCCC      | <20 (0)  | 333 (4)    | <b>0.33 (0.13-0.86, 0.02)</b>       | <b>0.32 (0.12-0.84, 0.02)</b>  |
| Metabolic PCCC       | 41 (6)   | 700 (9)    | <b>0.56 (0.32-0.98, 0.04)</b>       | <b>0.47 (0.25-0.91, 0.02)</b>  |
| Neonatal PCCC        | <20 (0)  | 264 (3)    | <b>0.36 (0.14-0.92, 0.03)</b>       | 0.26 (0.06-1.21, 0.09)         |
| Neuromuscular PCCC   | <20 (0)  | 721 (9)    | <b>0.28 (0.14-0.57, &lt; 0.001)</b> | <b>0.25 (0.11-0.57, 0.001)</b> |
| Renal PCCC           | 20 (3)   | 445 (5)    | 1.38 (0.74-2.56, 0.31)              | 1.46 (0.74-2.86, 0.27)         |
| Respiratory PCCC     | <20 (0)  | 425 (5)    | 0.70 (0.32-1.50, 0.35)              | 0.75 (0.29-1.95, 0.55)         |
| COVID Testing        |          |            |                                     |                                |
| COVID +PCR/Ag        | 207 (29) | 8241 (100) |                                     |                                |
| COVID +Antibody      | 624 (88) | <20 (0)    |                                     |                                |
| Laboratory Test      |          |            |                                     |                                |
| ESR (High)           | 509 (72) | 693 (8)    |                                     |                                |
| Albumin (Low)        | 454 (64) | 648 (8)    |                                     |                                |
| LDH (High)           | 436 (62) | 516 (6)    |                                     |                                |
| Serum Sodium (Low)   | 426 (60) | 1075 (13)  |                                     |                                |
| D-dimer (High)       | 401 (57) | 591 (7)    |                                     |                                |
| NT Pro BNP (High)    | 363 (51) | 315 (4)    |                                     |                                |
| ALC (Low)            | 351 (50) | 1219 (15)  |                                     |                                |
| CRP (High)           | 349 (49) | 343 (4)    |                                     |                                |
| Ferritin (High)      | 285 (40) | 285 (4)    |                                     |                                |
| Platelet Count (Low) | 261 (37) | 668 (8)    |                                     |                                |
| WBC (High)           | 229 (32) | 829 (10)   |                                     |                                |
| ALT (High)           | 217 (31) | 658 (8)    |                                     |                                |
| Procalcitonin (High) | 201 (28) | 227 (3)    |                                     |                                |
| BNP (High)           | 184 (26) | 80 (1)     |                                     |                                |
| IL6 (High)           | 137 (19) | 107 (1)    |                                     |                                |
| WBC (Low)            | 122 (17) | 840 (10)   |                                     |                                |
| Hgb (Low)            | 59 (8)   | 342 (4)    |                                     |                                |
| Fibrinogen (Low)     | 31 (4)   | 63 (1)     |                                     |                                |

| Clinical Outcomes                            |          |          |  |
|----------------------------------------------|----------|----------|--|
| Invasive Mechanical Ventilation <sup>¥</sup> | 117 (17) | 514 (6)  |  |
| ECMO                                         | <20 (0)  | 25 (0.3) |  |
| Vasopressor / Inotropic Support <sup>¥</sup> | 191 (27) | 426 (5)  |  |
| Deaths                                       | <20 (0)  | 95 (1)   |  |

Number and percent of children in the MIS-C and acute COVID-19 subgroups with a given demographic characteristic, pre-existing comorbidity, abnormal lab value during hospitalization, or clinical outcome. The odds ratio (OR) and adjusted odds ratio (aOR) (controlling for healthcare site) for having MIS-C (versus acute COVID-19) is shown for each. Those with a p-value < 0.05 are shown in bold. Given the low number of patients with diabetes mellitus, calculation of OR's for this potential risk factor was not feasible.

*Abbreviations:* ALC = absolute lymphocyte count, ANC = absolute neutrophil count, CRP = c-reactive protein, hgb = hemoglobin, IL6 = interleukin-6

\* Given the low number of children with diabetes mellitus in the subgroups, odds ratios for diabetes mellitus were not able to be calculated

† Odds ratio listed for sex is the odds of a male patient developing severe disease compared to a female patient; the odds ratio for age is the odds of a patient <12-years-old getting severe disease compared to a patient ≥12-years-old; the odds ratio for ethnicity is the odds of a Hispanic patient getting severe disease vs. a non-Hispanic patient (either not Hispanic or unknown)

‡ Odds ratio for a Black / African American child developing severe disease as compared to a White child

± Odds ratio for a non-Black, non-White child developing severe disease as compared to a White child. Missing / Unknown and Native Hawaiian / Pacific Islander racial categories not shown.

↓ BMI calculated as per the Centers for Disease Control and Prevention (CDC) guidelines<sup>13</sup> with obesity defined as any child ≥ 2-years-old with a BMI ≥ 95th percentile for age and sex. The percent of children with obesity was calculated by dividing the number of children ≥2-years-old who had a BMI for age and sex ≥95th percentile in that subgroup, by the number of children in that subgroup who were ≥2 years old and had a BMI measurement available (N = 529 for MIS-C and N = 3,829 for acute COVID-19).

¥ p < 0.001 for comparison of subgroup proportions

eTable 8: Delta versus pre-Delta differences in patient characteristics, outcomes, and severity risk factors.

| Variable                                     | Pre-Delta Era              |                             | Delta Era                 |                             | Odds for Severe Disease        |                                 |
|----------------------------------------------|----------------------------|-----------------------------|---------------------------|-----------------------------|--------------------------------|---------------------------------|
|                                              | All Cases<br>(N = 138,071) | Hospitalized<br>(N = 8,507) | All Cases<br>(N = 29,191) | Hospitalized<br>(N = 1,738) | OR Change (95%<br>CI, p-value) | aOR Change (95%<br>CI, p-value) |
| Sex <sup>†</sup>                             |                            |                             |                           |                             | 1.36 (0.92-2.01,<br>0.12)      | 1.45 (1.13-1.87,<br>0.003)      |
| Male                                         | 69,062<br>(50.0%)          | 4,279 (50.3%)               | 14,727<br>(50.5%)         | 830 (47.8%)                 |                                |                                 |
| Female                                       | 68,442<br>(49.6%)          | 4,213 (49.5%)               | 14,440<br>(49.5%)         | 906 (52.1%)                 |                                |                                 |
| Other                                        | 567 (0.4%)                 | <20 (0%)                    | 24 (0.1%)                 | <20 (0%)                    |                                |                                 |
| Age <sup>†</sup>                             |                            |                             |                           |                             |                                |                                 |
| Age in years,<br>median (IQR)                | 12.3 (6.2, 16.4)           | 11.1 (2.7,<br>16.0)         | 10.3 (5.3,<br>14.9)       | 9.5 (1.9, 15.4)             | 1.14 (0.77-1.71,<br>0.51)      | 1.13 (0.91-1.40,<br>0.26)       |
| Ethnicity <sup>†</sup>                       |                            |                             |                           |                             | 0.56 (0.31-0.99,<br>0.05)      | 0.67 (0.44-1.02,<br>0.06)       |
| Hispanic or Latino                           | 31,248<br>(22.6%)          | 2,401 (28.2%)               | 5,220<br>(17.9%)          | 287 (16.5%)                 |                                |                                 |
| Not Hispanic or Latino                       | 85,112<br>(61.6%)          | 4,854 (57.1%)               | 20,119<br>(68.9%)         | 1,262 (72.6%)               |                                |                                 |
| Missing/Unknown                              | 21,711<br>(15.7%)          | 1,252 (14.7%)               | 3,852<br>(13.2%)          | 189 (10.9%)                 |                                |                                 |
| Race <sup>±</sup>                            |                            |                             |                           |                             | 1.69 (1.02-2.82,<br>0.04)      | 1.58 (1.09-2.30,<br>0.02)       |
| Asian                                        | 3,133 (2.3%)               | 194 (2.3%)                  | 475 (1.6%)                | 21 (1.2%)                   |                                |                                 |
| Black or African American <sup>‡</sup>       | 20,171<br>(14.6%)          | 2,096 (24.6%)               | 6,859<br>(23.5%)          | 611 (35.2%)                 | 0.73 (0.45-1.18,<br>0.20)      | 0.90 (0.64-1.25,<br>0.52)       |
| Missing/Unknown                              | 3,467 (2.5%)               | 301 (3.5%)                  | 631 (2.2%)                | 22 (1.3%)                   |                                |                                 |
| Native Hawaiian or Other Pacific<br>Islander | 352 (0.3%)                 | 31 (0.4%)                   | 42 (0.1%)                 | <20 (0%)                    |                                |                                 |
| White                                        | 77,211<br>(55.9%)          | 3,580 (42.1%)               | 15,636<br>(53.6%)         | 753 (43.3%)                 |                                |                                 |
| Other                                        | 33,623<br>(24.4%)          | 2,289 (26.9%)               | 5,520<br>(18.9%)          | 323 (18.6%)                 |                                |                                 |
| Comorbidity                                  |                            |                             |                           |                             |                                |                                 |
| Known BMI                                    | 57,481<br>(41.6%)          | 4,356 (51.2%)               | 12,398<br>(42.5%)         | 765 (44.0%)                 |                                |                                 |



|                                              |                   |               |                  |             |                           |                            |
|----------------------------------------------|-------------------|---------------|------------------|-------------|---------------------------|----------------------------|
| Obese ( $\geq$ 95th percentile) <sup>‡</sup> | 14,477<br>(25.2%) | 1,402 (32.2%) | 3,327<br>(26.8%) | 254 (33.2%) | 0.77 (0.45-1.31,<br>0.33) | 0.77 (0.44-1.33,<br>0.35)  |
| Asthma                                       | 10,583 (7.7%)     | 801 (9.4%)    | 2,706 (9.3%)     | 198 (11.4%) | 1.43 (0.80-2.57,<br>0.23) | 1.35 (0.79-2.31,<br>0.28)  |
| Diabetes                                     | 938 (0.7%)        | 253 (3.0%)    | 133 (0.5%)       | 32 (1.8%)   | *                         | *                          |
| PCCC Category                                |                   |               |                  |             |                           |                            |
| Any PCCC                                     | 19468 (14%)       | 2205 (26%)    | 4318 (15%)       | 432 (25%)   | 1.04 (0.95-1.13,<br>0.38) | 1.04 (0.98-1.11,<br>0.20)  |
| Congenital / Genetic                         | 5430 (4%)         | 625 (7%)      | 1246 (4%)        | 151 (9%)    | 0.77 (0.39-1.53,<br>0.45) | 0.86 (0.48-1.54,<br>0.61)  |
| Cardiovascular                               | 4040 (3%)         | 803 (9%)      | 760 (3%)         | 154 (9%)    | 1.31 (0.68-2.51,<br>0.42) | 1.38 (0.84-2.27,<br>0.21)  |
| Gastrointestinal                             | 2982 (2%)         | 649 (8%)      | 556 (2%)         | 119 (7%)    | 0.95 (0.39-2.33,<br>0.91) | 0.95 (0.36-2.47,<br>0.91)  |
| Heme/Immune                                  | 4605 (3%)         | 720 (8%)      | 1290 (4%)        | 162 (9%)    | 1.76 (0.89-3.46,<br>0.10) | 1.64 (1.15-2.31,<br>0.006) |
| Malignancy                                   | 1469 (1%)         | 344 (4%)      | 253 (1%)         | 48 (3%)     | 1.43 (0.51-4.02,<br>0.50) | 1.35 (0.54-3.37,<br>0.52)  |
| Metabolic                                    | 4549 (3%)         | 694 (8%)      | 964 (3%)         | 134 (8%)    | 1.17 (0.57-2.38,<br>0.67) | 1.38 (0.83-2.30,<br>0.22)  |
| Neonatal                                     | 1466 (1%)         | 234 (3%)      | 384 (1%)         | 64 (4%)     | 1.18 (0.46-3.06,<br>0.73) | 1.18 (0.62-2.25,<br>0.62)  |
| Neuromuscular                                | 3532 (3%)         | 709 (8%)      | 717 (2%)         | 143 (8%)    | 1.54 (0.76-3.15,<br>0.23) | 1.64 (0.69-3.09,<br>0.32)  |
| Renal                                        | 2330 (2%)         | 446 (5%)      | 458 (2%)         | 88 (5%)     | 0.55 (0.20-1.54,<br>0.26) | 0.61 (0.21-1.82,<br>0.38)  |
| Respiratory                                  | 2139 (2%)         | 419 (5%)      | 419 (1%)         | 80 (5%)     | 0.66 (0.26-1.70,<br>0.39) | 0.63 (0.23-1.72,<br>0.37)  |
| Tech Dependence                              | 1830 (1%)         | 616 (7%)      | 358 (1%)         | 126 (7%)    | 0.74 (0.27-2.03,<br>0.56) | 0.71 (0.29-1.77,<br>0.47)  |
| Transplant                                   | 222 (0%)          | 94 (1%)       | 32 (0.1%)        | <20 (0%)    | 1.37 (0.24-7.71,<br>0.72) | 1.27 (0.35-4.61,<br>0.72)  |
| Clinical Outcomes                            |                   |               |                  |             |                           |                            |
| Mechanical Ventilation                       | 700 (0.5%)        | 700 (8.2%)    | 96 (0.3%)        | 96 (5.5%)   |                           |                            |
| Vasoactive-Inotropic Support                 | 760 (0.6%)        | 760 (8.9%)    | 108 (0.4%)       | 108 (6.2%)  |                           |                            |
| ECMO                                         | 39 (0.03%)        | 39 (0.5%)     | <20 (0%)         | <20 (0%)    |                           |                            |
| Mortality                                    | 134 (0.1%)        | 122 (1.4%)    | <20 (0%)         | <20 (0%)    |                           |                            |

The number and percent of children in each era (Delta, defined as patients with a visit start date on/after 6/26/2021, and pre-Delta, defined as those with a start date before 6/26/2021) with a given demographic characteristic, pre-existing comorbidity, or clinical outcome. Also shown is the change in the odds ratios (ORs) for severe (as compared to moderate) disease observed during the Delta era as compared with the pre-Delta era. Similarly, the change in adjusted odds ratio (aOR) (correcting for health care site), is also shown.

\*Given the low number of children with diabetes mellitus, calculation of OR's for this potential risk factor was not feasible

† Odds ratio listed for sex is the odds of a male patient developing severe disease compared to a female patient; the odds ratio for age is the odds of a patient <12-years-old getting severe disease compared to a patient  $\geq$ 12-years-old; the odds ratio for ethnicity is the odds of a Hispanic patient getting severe disease vs. a non-Hispanic patient (either not Hispanic or unknown)

‡ Odds ratio for a Black / African American child developing severe disease as compared to a White child

± Odds ratio for a non-Black, non-White child developing severe disease as compared to a White child

↓ BMI calculated as per the Centers for Disease Control and Prevention (CDC) guidelines<sup>13</sup> with obesity defined as any child  $\geq$  2-years-old with a BMI  $\geq$  95th percentile for age and sex. The percent of children with obesity was calculated by dividing the number of children  $\geq$ 2-years-old who had a BMI for age and sex  $\geq$ 95th percentile in that subgroup, by the number of children in that subgroup who were  $\geq$ 2 years old and had a BMI measurement available.

eFigure 1: Geographic distribution and case incidence over time N3C pediatric patients.

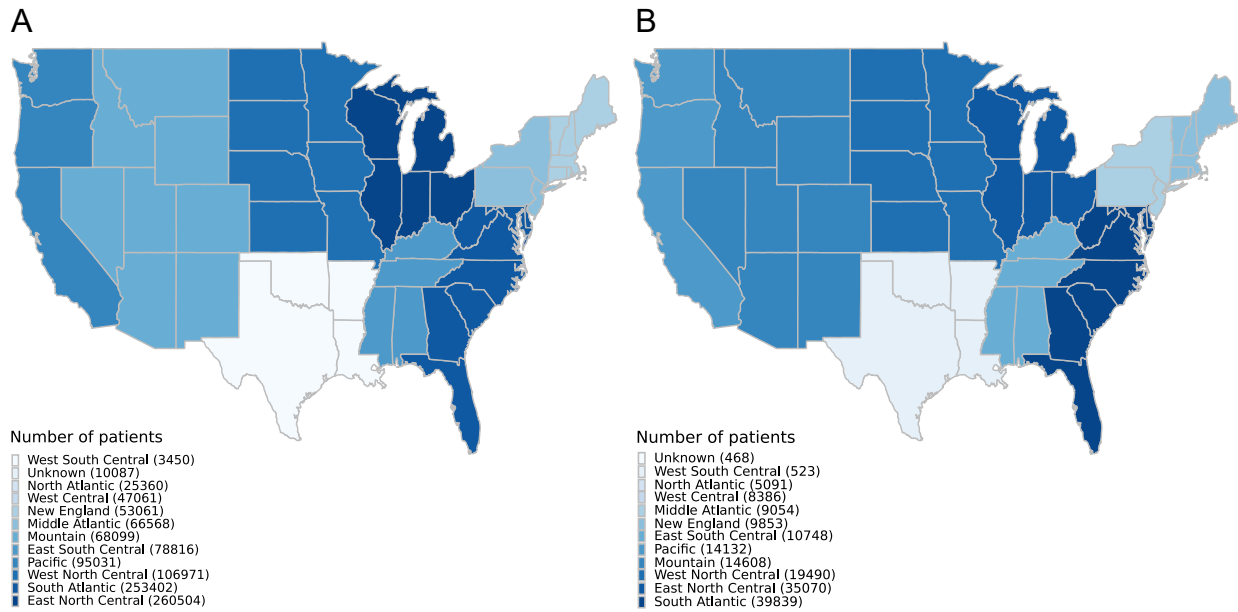

(a) Geographic distribution of all pediatric N3C patients (N = 1,068,410). (b) Geographic distribution of SARS-CoV-2 positive pediatric cases only (N = 167,262).

eFigure 2: Subregion positive test result trends by test type

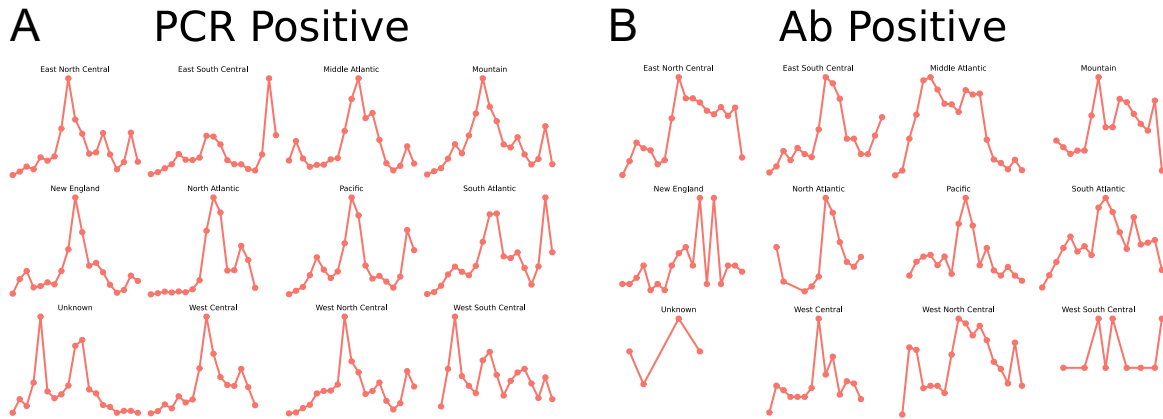

(a) Monthly trends for positive PCR/Ag pediatric SARS-CoV-2 tests by subregion. (b) Monthly trends for positive SARS-CoV-2 antibody tests by subregion. Note that these individual subregion plots are scaled such that the maximum value is located at the top of the chart regardless of absolute value.

eFigure 3: Change in qualifying criteria for “severe” subgroup classification over time

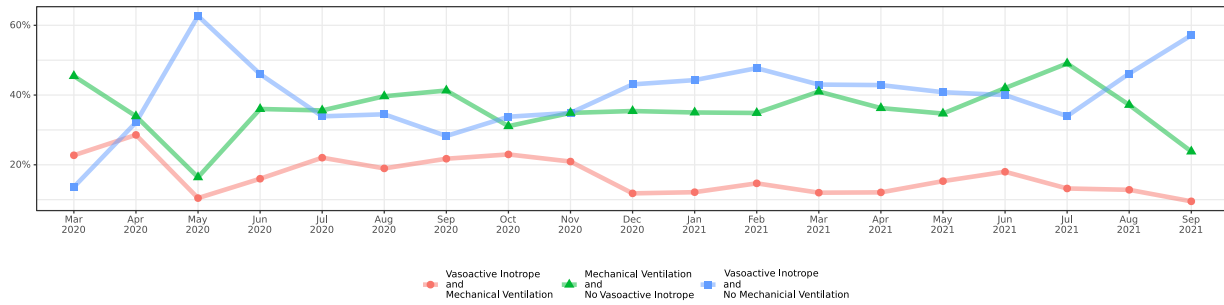

Shown here is the percent of patient encounters each month who meet different criteria for “severe” maximum clinical severity status during the study period.

eFigure 4: Maximum clinical severity distributions among prespecified age groups.

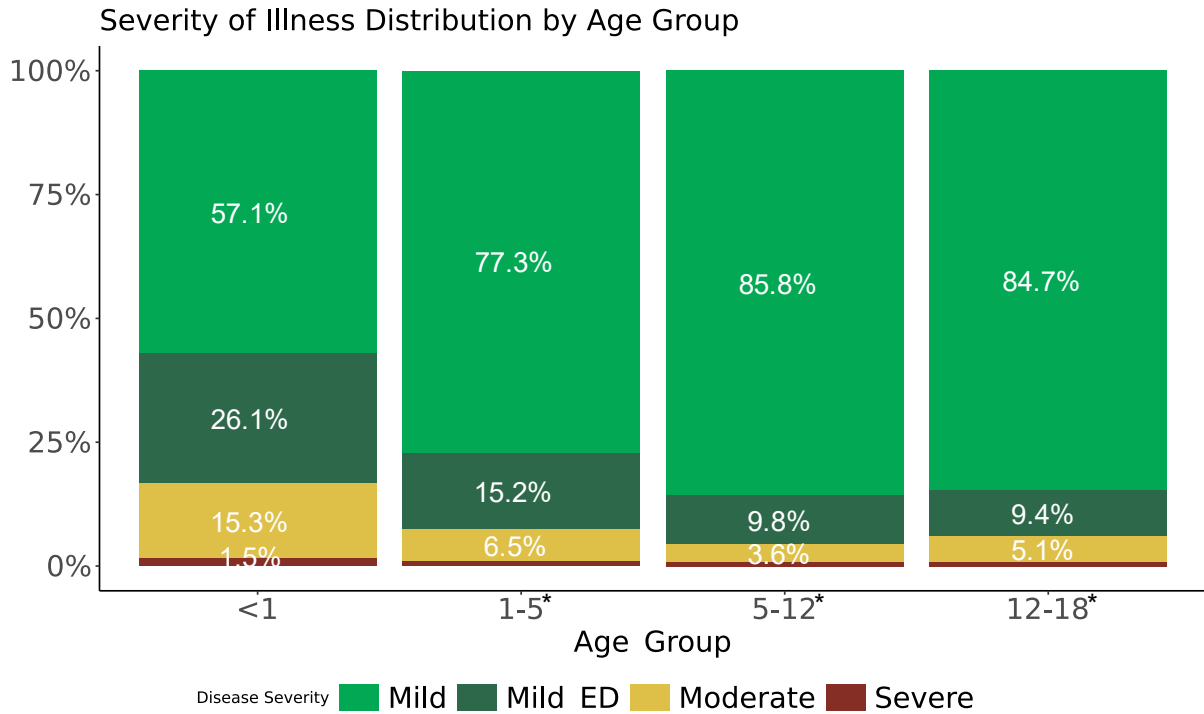

For each specified age group (<1 year old, 1-5 years old, 5-12 years old, and 12-18 years old) the percent of patients within each of the four maximum clinical severity categories is shown.

\*Severe category percentages for the 1-5, 5-12, and 12-18 year old age subgroups are 1%, 0.8%, and 0.8%, respectively.

eFigure 5: Antimicrobial and immunomodulatory medication usage trends

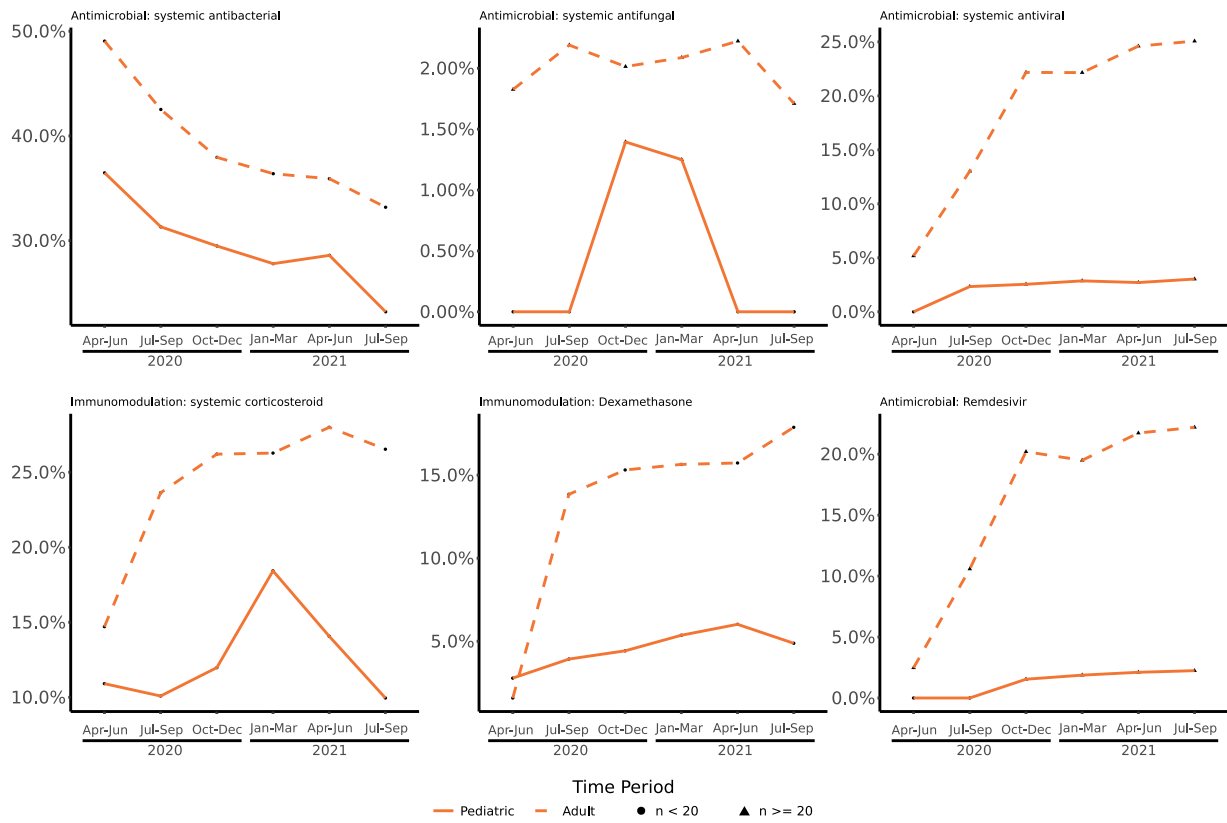

For each three-month period during the study time period, the percent of children and adults who receive a given medication / medication class during their hospitalization is illustrated.

eFigure 6: Additional vital sign and laboratory value in-hospital trajectories

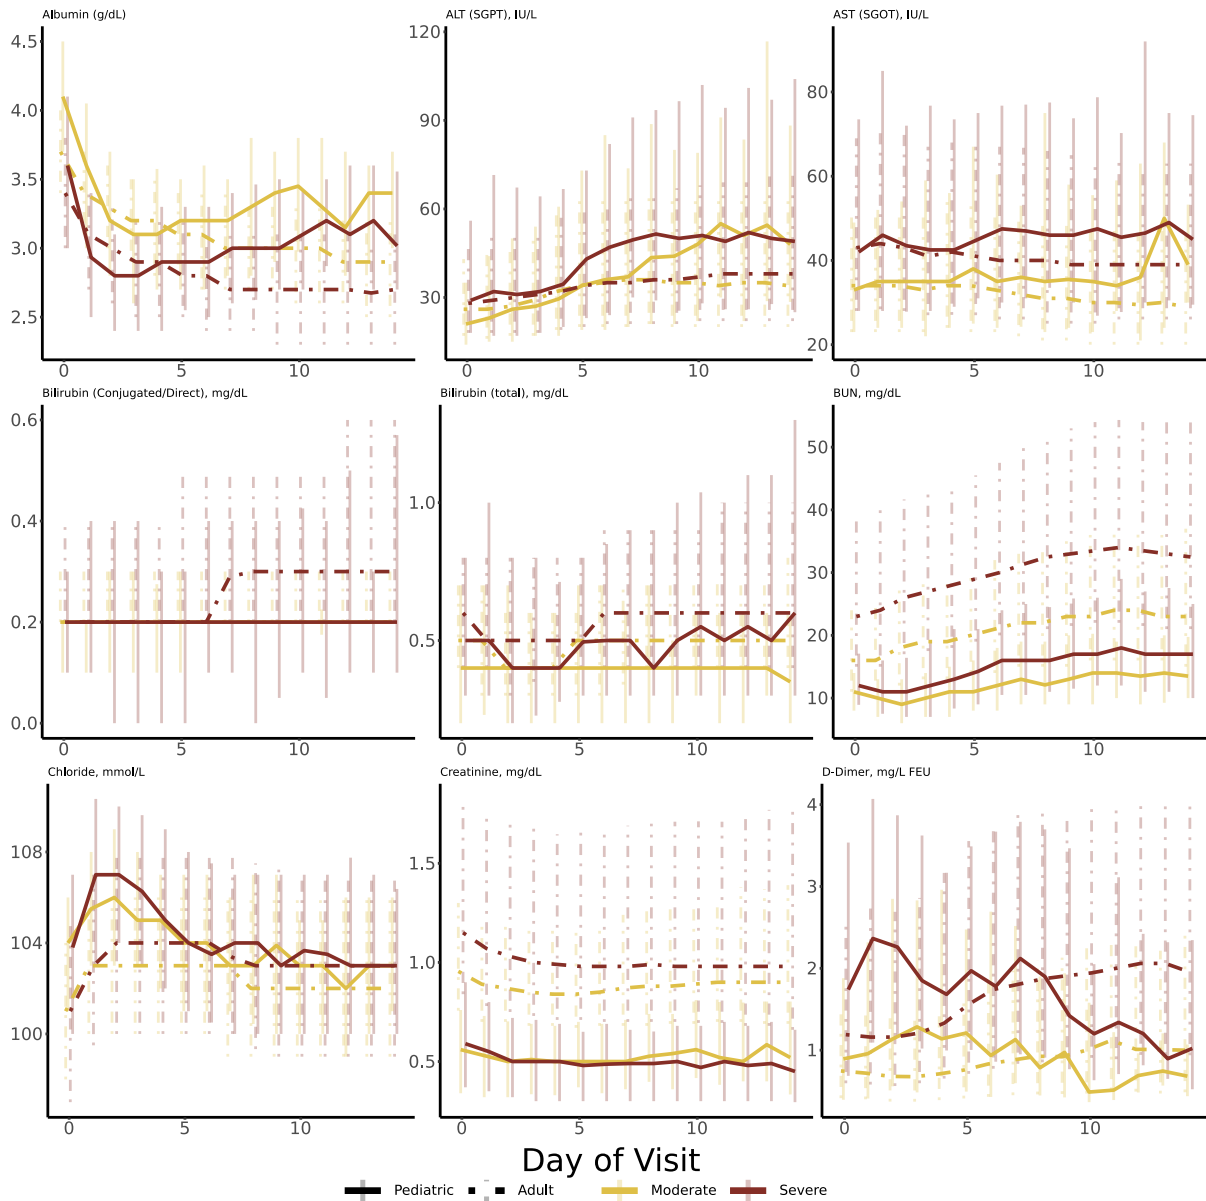

Trajectories of additional selected vital sign and laboratory median values by day of hospitalization during pediatric hospital encounters as compared to N3C adult hospital encounters. For each day of hospitalization, the median and interquartile range (IQR) for those patients with a given vital sign or laboratory value available on that day are calculated. The vertical bars represent the IQR for the values of that specific vital sign or laboratory test value on that day of hospitalization.



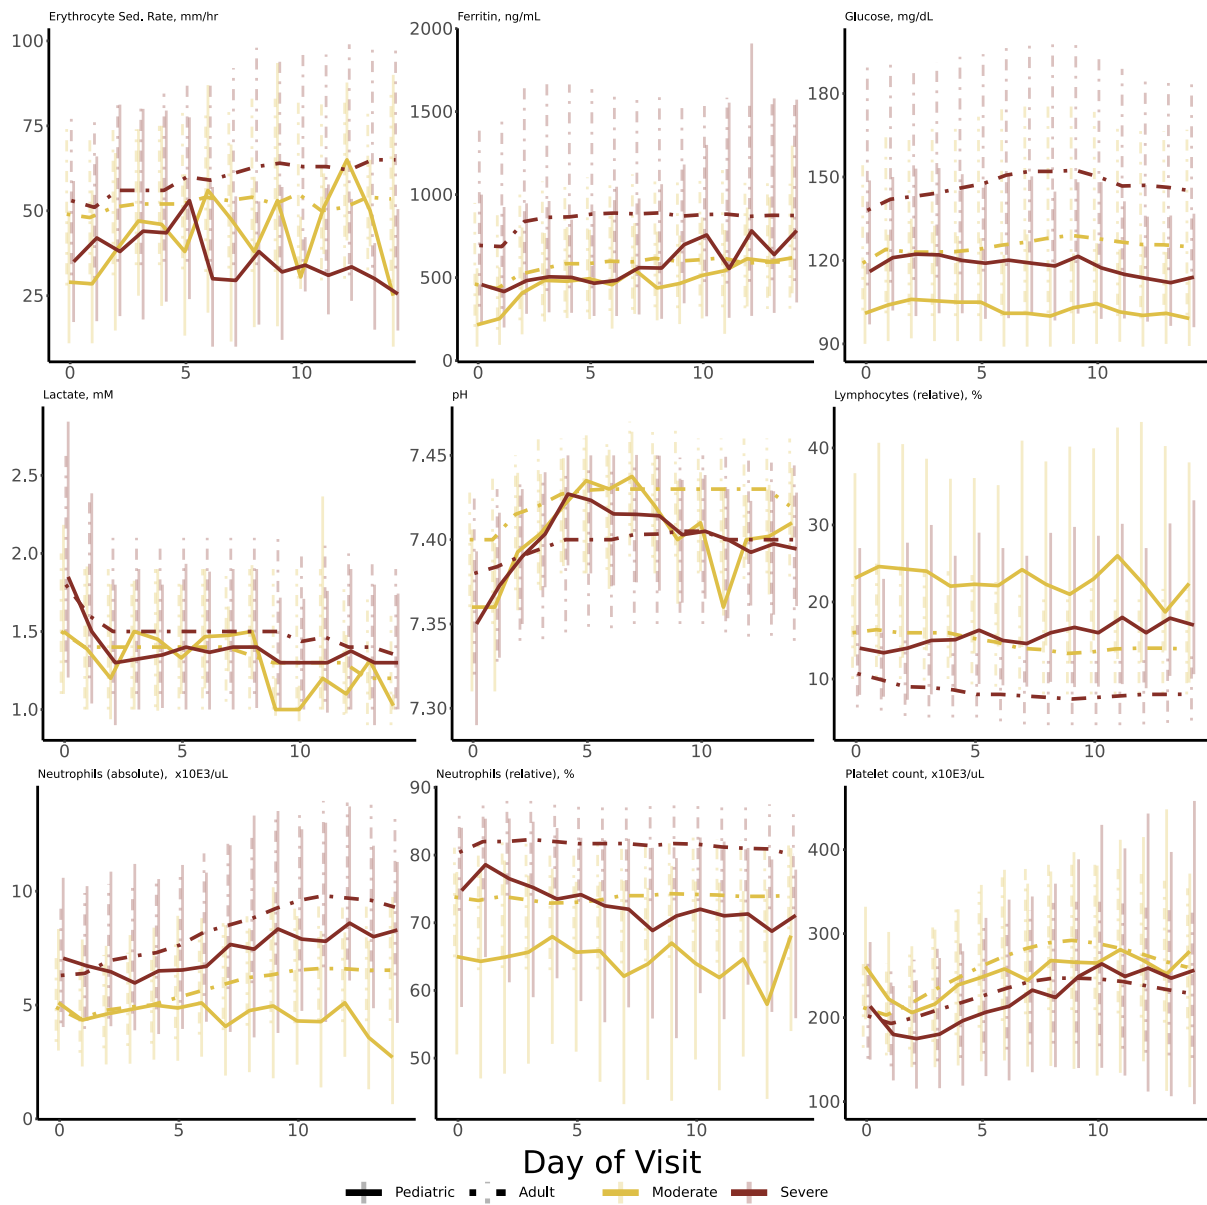

eFigure 6 Continued

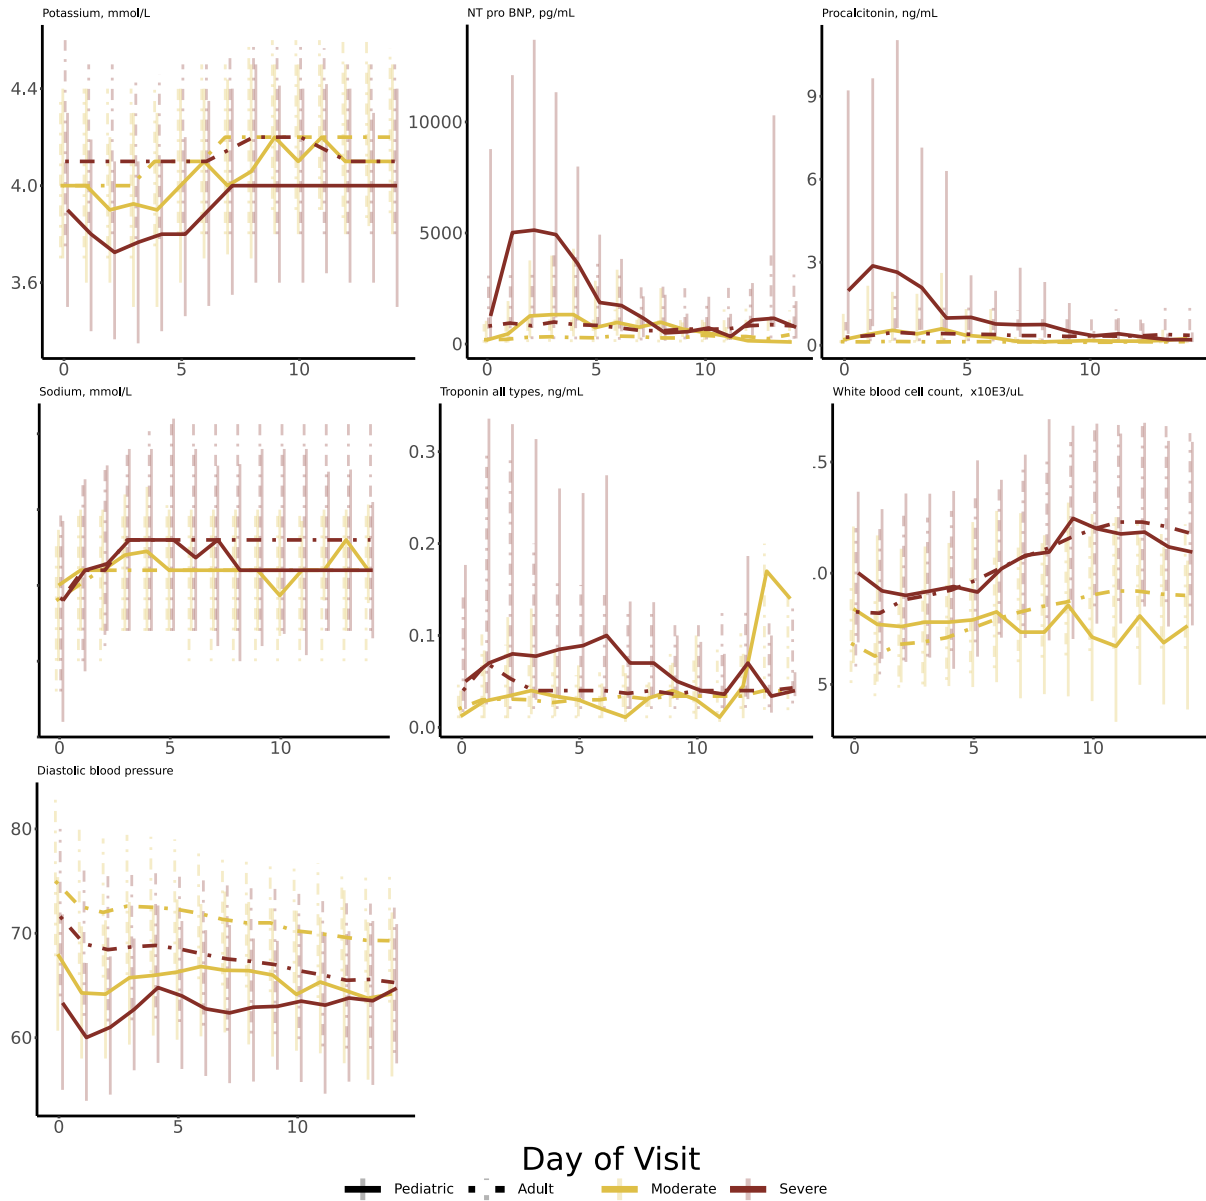

eFigure 6 Continued

## eReferences

1. The National COVID Cohort Collaborative. The N3C Phenotype & Data Acquisition Workstream. GitHub. [https://github.com/National-COVID-Cohort-Collaborative/Phenotype\\_Data\\_Acquisition](https://github.com/National-COVID-Cohort-Collaborative/Phenotype_Data_Acquisition). Published 2021. Updated March 17, 2021. Accessed June 15, 2021.
2. Bennett TD, Moffitt RA, Hajagos JG, et al. Clinical Characterization and Prediction of Clinical Severity of SARS-CoV-2 Infection Among US Adults Using Data From the US National COVID Cohort Collaborative. *Jama Netw Open*. 2021;4(7):e2116901-e2116901.
3. Haendel MA, Chute CG, Bennett TD, et al. The National COVID Cohort Collaborative (N3C): Rationale, design, infrastructure, and deployment. *J Am Med Inform Assoc*. 2021;28(3):427-443.
4. OHDSI. OMOP Common Data Model. Observational Health Data Sciences and Informatics. <https://www.ohdsi.org/data-standardization/the-common-data-model/>. Published 2021. Accessed June 18, 2021.
5. Marshall J, Murthy S, Diaz J, Adhikari N, Angus D, Arabi Y. WHO Working Group on the Clinical Characterisation and Management of COVID-19 infection: A minimal common outcome measure set for COVID-19 clinical research. *Lancet Infect Dis*. 2020;20:e192-e197.
6. Feudtner C, Christakis DA, Connell FA. Pediatric deaths attributable to complex chronic conditions: a population-based study of Washington State, 1980-1997. *Pediatrics*. 2000;106(1 Pt 2):205-209.
7. Feinstein JA, Russell S, DeWitt PE, Feudtner C, Dai D, Bennett TD. R package for pediatric complex chronic condition classification. *JAMA pediatrics*. 2018;172(6):596-598.
8. Venkataraman S, Yang Z, Liu D, et al. Sparkr: Scaling r programs with spark. Paper presented at: Proceedings of the 2016 International Conference on Management of Data2016.
9. PySpark Documentation. Apache Spark. <http://spark.apache.org/docs/latest/api/python/>. Accessed September 1, 2021.
10. Zaharia M, Xin RS, Wendell P, et al. Apache spark: a unified engine for big data processing. *Communications of the ACM*. 2016;59(11):56-65.
11. Wickham H, Chang W, Wickham MH. Package ‘ggplot2’. *Create Elegant Data Visualisations Using the Grammar of Graphics Version*. 2016;2(1):1-189.
12. von Elm E, Altman DG, Egger M, et al. The Strengthening the Reporting of Observational Studies in Epidemiology (STROBE) statement: guidelines for reporting observational studies. *J Clin Epidemiol*. 2008;61(4):344-349.
13. Centers for Disease Control and Prevention. Defining Childhood Obesity. <https://www.cdc.gov/obesity/childhood/defining.html>. Updated July 3, 2018. Accessed March 1, 2021.
14. Centers for Disease Control and Prevention. Variant Proportions. CDC. Published 2021. Accessed Sep 23, 2021.
